# Supplementary material for: Steroid Hormone Control of Cell Death and Cell Survival: Molecular Insights Using RNAi
Source: PLoS Genet. 2009 Feb 13;5(2):e1000379. doi: 10.1371/journal.pgen.1000379 (PMC2632862; doi:10.1371/journal.pgen.1000379)
Supplement: Table S1 — List of names, primer sequences, and viability results for genes targeted by RNAi. (0.20 MB XLS) [file pgen.1000379.s001.xls]

## Sheet: Sheet1
Supplementary Table I: List of names, primer sequences, and viability results for genes targeted by RNAi.
*Cell viability refers to the effects of the RNAi: thus "increased" indicates potential pro-death genes and cell viability "decreased" indicates pro-survival genes. NS- Not Significant
Boutrous et al. 2004**: If the dsRNA treatment gave same phenotype as in Boutrous et al., 2004, a second set of primer was not designed.											1st set dsRNA		2nd set dsRNA
Genes highlighted in bold black were used as controls; genes highlighted in bold blue showed consistent effects with two dsRNAs and were analyzed further in our study.
											p-value compared		p-value compared
	Gene	1st set Forward primer	1st set Reverse primer	Amplicon Length	1st set Forward primer sequence	1st set Reverse primer sequence	2nd set Forward primer	2nd set Reverse primer	2nd set Forward primer sequence	2nd set Reverse primer sequence	to Hs.58006+20HE	*cell viability (increased/decreased)	to Hs.58006+20HE	*cell viability (increased/decreased)
	Hs	Hs.58006-170F22_RNAi	Hs.58006-878R22_RNAi	708	TAATACGACTCACTATAGGATTGGAGACACCTTCAGACTCG	TAATACGACTCACTATAGGAGTCCTGTGCTATGTCCCTCCT					1	reference
	diap1	Th-195F20_RNAi	Th-899R21_RNAi	704	TAATACGACTCACTATAGGCCAAACCGGCATGTACTTCA	TAATACGACTCACTATAGGAGCTGACCCTTCATCAGCTTG					0.000154	decreased
	Dronc	Dronc-41F39_RNAi_2	Dronc-555R40_RNAi_2	514	TAATACGACTCACTATAGGATCGCGAGCATATACGCAAG	TAATACGACTCACTATAGGAATATGGCACTATCCCCACCA					0.0054	increased
	BR-C	BR_C com 1F rnai	BR_C com 200R rnai	199	TAATACGACTCACTATAGGTAAATAATCATTAGTGAAAGGTCCATC	TAATACGACTCACTATAGGGTTGTGATCGTCGTCAACC	BR_C com 602F rnai	BR_C com 989R rnai	TAATACGACTCACTATAGGGCAGGATGTCAACTTCATGGAC	TAATACGACTCACTATAGGACTGCTGCGGTGCATCAT	0.00039	increased	0	increased
	rpr	rpr-13F21_RNAi	rpr-240R21_RNAi	227	TAATACGACTCACTATAGGTTCTACATACCCGATCAGGCG	TAATACGACTCACTATAGGTGGACTATTGGTTTTCCCCGT					0.00668	increased
	Hid	Hid-342F39_RNAi	Hid-1045R40_RNAi	703	TAATACGACTCACTATAGGAAATCTTCCAGTATCCGCCG	TAATACGACTCACTATAGGTGGCAGACTGGATTATTGCTG	Hid-230F41_RNAi_2	Hid-831R41_RNAi_2	TAATACGACTCACTATAGGCCGAGCAAAAACTTGACTTGAG	TAATACGACTCACTATAGGGGTACATCCTGACCCACTCGTA	0.011	increased	0.00161793	increased
	E75	E75-216F41-RNAi	E75-923R41-RNAi	707	TAATACGACTCACTATAGGCATCTGTCTAAATGGCCAGGTG	TAATACGACTCACTATAGGCCAACGATATCCATCTCAGCTG	E75-1119F-RNAi-2-41	E75-1776R-RNAi-2-39	TAATACGACTCACTATAGGCCGCTACAGAAAGCTAGATTCG	TAATACGACTCACTATAGGTTGGATAATATCGCTGCGCT	0.001	decreased	0.001	decreased
	EcR	EcR-571F40_RNAi	EcR-1292R40_RNAi	721	TAATACGACTCACTATAGGTAACGTACAATCAGTTGGCCG	TAATACGACTCACTATAGGCATGAACGTCCCAGATCTCCT	EcR-1310F39_RNAi_2	EcR-2030R39_RNAi_2	TAATACGACTCACTATAGGCAGTCGCACCTTCAGATTACCC	TAATACGACTCACTATAGGTCTACTCCAGCAGGACGTCGAT	5.39299e-05	increased	0.00640689	increased
	Grim	Grim-2F40_RNAi	Grim-389R40_RNAi	387	TAATACGACTCACTATAGGTGGCCATCGCCTATTTCATAC	TAATACGACTCACTATAGGACGTCGTCCTCATCGTTGTTC	Grim-39F41_RNAi_2	Grim-596R41_RNAi_2	TAATACGACTCACTATAGGCCATATTTCATCCTGGTGGAGA	TAATACGACTCACTATAGGCTGCGGTTGCATCTTTGTTTTG	1.35858e-05	decreased	0.0704938	NS
	S6K	S6K-182F40_RNAi	S6K-895R40_RNAi	713	TAATACGACTCACTATAGGACAGCTCTGCGAGGAGAATGT	TAATACGACTCACTATAGGCTCGATGGTCTTCTTGCGATT	S6K-1239F41_RNAi_2	S6K-1894R40_RNAi_2	TAATACGACTCACTATAGGACCCTCGATACTGGAGGACATG	TAATACGACTCACTATAGGCATCTTCTCCGTCTGCCTCAT	9.6074e-05	decreased	0.531977	decreased
	Ras85D	Ras85D-2F41_RNAi	Ras85D-488R41_RNAi	486	TAATACGACTCACTATAGGTGACGGAATACAAACTGGTCGT	TAATACGACTCACTATAGGCACCAGTGTGTAAAATGCATCG	Ras85D-568F39_RNAi_2	Ras85D-987R41_RNAi_2	TAATACGACTCACTATAGGAAATGCTCTAAACGGCCACG	TAATACGACTCACTATAGGCGGATATAGCAGCTGAACCAAG	0.000453998	decreased	0.0183392	decreased
	Eip93F	Eip93F-395F21_RNAi	Eip93F-1122R20_RNAi	727	TAATACGACTCACTATAGGCTTCTGTGTTAACGGTCGCCT	TAATACGACTCACTATAGGAACAGCCGGTTGTCCAGAAT	Eip93F-2685F40_RNAi	Eip93F-3403R40_RNAi	TAATACGACTCACTATAGGCACAGGCGTTATCCTTTCAGC	TAATACGACTCACTATAGGTTCGCACTTGATGTGACTGCT	0.000560507	decreased	0.471732	NS
	Sox14	Sox14-32F39_RNAi	Sox14-707R40_RNAi	675	TAATACGACTCACTATAGGAACCACCATTAAGCTTGCGC	TAATACGACTCACTATAGGGCTGCTTATCGTCCTTGCTGA	Sox14-1035F41_RNAi_2	Sox14-1753R39_RNAi_2	TAATACGACTCACTATAGGAGCTCAACTCCGCCGATATTAT	TAATACGACTCACTATAGGCAGAATGCTGCATTCGCTGT	0.000665297	increased	0.00486958	increased
	CG15239	CG15239-87F21_RNAi	CG15239-788R21_RNAi	701	TAATACGACTCACTATAGGGCGCACAGACAAGATATCGGA	TAATACGACTCACTATAGGTCCGGTCCAAACTTGAAACAG	CG15239-1026F39_RNAi_2	CG15239-1596R41_RNAi_2	TAATACGACTCACTATAGGGCTTTAGTTTGGCCGGACTT	TAATACGACTCACTATAGGCCTTAAGCGCTACGACCTATGA	0.000706096	decreased	0.0194711	decreased
	Rpn2	Rpn2-44F39_RNAi	Rpn2-756R40_RNAi	724	TAATACGACTCACTATAGGAGCCAATGCCGGATCTTAAG	TAATACGACTCACTATAGGGGCAATCTGATAGGCCATCAG					0.000802659	decreased	Boutrous et al. 2004**
	SoxN	SoxN_3501F rnai	SoxN 3800R rnai	299	TAATACGACTCACTATAGGCAAATTCGTTTGGTTTAGCATTT	TAATACGACTCACTATAGGATTATGGTTGTCTTGTCTGGTATTTG	SoxN 1851F rnai	SoxN 2200R rnai	TAATACGACTCACTATAGGAACGCGCCCAATGGATAC	TAATACGACTCACTATAGGGACACCGGTTCGGACTTG	0.002	decreased	0.079	NS
	Dredd	Dredd-5F39_RNAi	Dredd-727R41_RNAi	722	TAATACGACTCACTATAGGCAGCGAGTGCAATTTATCGG	TAATACGACTCACTATAGGCGGAGCGTTACTAATGATGGTG	Dredd-87F41_RNAi_2	Dredd-694R40_RNAi_2	TAATACGACTCACTATAGGATACAATGTGGAGGCGTACGAC	TAATACGACTCACTATAGGTGGACGTACAACTGCGCTAAC	0.000854732	decreased	0.0646694	NS
	Pros26.4	Pros26.4-198F40_RNAi	Pros26.4-902R41_RNAi	704	TAATACGACTCACTATAGGAGCGCATCAAGGATTACCTGA	TAATACGACTCACTATAGGCACCAGAATTTGAATCGTAGCG					0.000883954	decreased	Boutrous et al. 2004**
	Tor	Tor-728F40_RNAi	Tor-1428R39_RNAi	700	TAATACGACTCACTATAGGCAAGGATCAGAAAGGCGTGAC	TAATACGACTCACTATAGGAAGAAGCGTTATGCAGGCAA	Tor-2512F40_RNAi_2	Tor-3217R41_RNAi_2	TAATACGACTCACTATAGGCCCATATCACAAGTACCCCGT	TAATACGACTCACTATAGGCGTGACCATTCTATCCTTGGAG	0.000951007	decreased	0.0263903	decreased
	sickle	sickle-3F39_RNAi	sickle-319R39_RNAi	316	TAATACGACTCACTATAGGGGCCATTCCATTTTTCGAAG	TAATACGACTCACTATAGGCCTGCGGTTGTATTTGAACG	sickle-361F40_RNAi_2	sickle-567R39_RNAi_2	TAATACGACTCACTATAGGGCTCCTAAAAGCGCAACTTGT	TAATACGACTCACTATAGGTTTTGTTGTATCCCGACGGA	0.000984011	decreased	0.120589	NS
	CG10777	CG10777-220F21_RNAi	CG10777-920R20_RNAi	700	TAATACGACTCACTATAGGCCCTATGGCGTGATGACCTAT	TAATACGACTCACTATAGGCGAATTATTGGCGGCTGATT	CG10777-8F_RNAi	CG10777-710R_RNAi	TAATACGACTCACTATAGGGGACCCATTGCTCTAGTGTTGG	TAATACGACTCACTATAGGGGACTTGCCGTTACGGAAATC	0.00125885	decreased	0.0510802	NS
	CG9091(RpL37)	CG9091-30F21_RNAi	CG9091-180R21_RNAi	150	TAATACGACTCACTATAGGGTAAGCGCCACAATAAGACGC	TAATACGACTCACTATAGGTCTTCCTCCTCTTGGCCTTCA	CG9091-443F41_RNAi_2	CG9091-805R40_RNAi_2	TAATACGACTCACTATAGGCAAGATGTATATCCCACACCGG	TAATACGACTCACTATAGGCTGCCCTGGAAAAGTATTCGA	0.00132497	increased	0.00262651	increased
	Cp1	Cp1-111F22_RNAi	Cp1-818R22_RNAi	707	TAATACGACTCACTATAGGACCGCAAGAACTATCAGGATGA	TAATACGACTCACTATAGGGTAGAACTGGAACGACTCGTGG	Cp1-857F40_RNAi_2	Cp1-1209R39_RNAi_2	TAATACGACTCACTATAGGGAATCTGGATCACGGTGTGCT	TAATACGACTCACTATAGGACATGATGGCAGAGAAACGC	0.00172865	decreased	0.00935287	decreased
	CG13907	CG13907-261F41_RNAi	CG13907-962R40_RNAi	701	TAATACGACTCACTATAGGCAACATGATCGTGGACGGTATC	TAATACGACTCACTATAGGAGCAGCTCCAGATTCAAGCTG	CG13907-1138F41_RNAi_2	CG13907-1841R40_RNAi_2	TAATACGACTCACTATAGGAGGAACTCGGAGTCGGAGAATA	TAATACGACTCACTATAGGATGATGGACAGAAGCATGGCT	0.0019864	decreased	0.0416804	increased
	Smr	Smr-5308F41_RNAi	Smr-5976R41_RNAi	668	TAATACGACTCACTATAGGGCGATGAGACGGATGTCAGTAC	TAATACGACTCACTATAGGGCTCAATTACCGAGAATACGCA	Smr-2398F41_RNAi_2	Smr-2898R41_RNAi_2	TAATACGACTCACTATAGGTGCTAGCGGAGAAGATCTATGC	TAATACGACTCACTATAGGGCATCTTTTTATCCTCCAACGC	0.00205045	decreased	0.00198327	decreased
	CG6194 (Atg4b)	CG6194-19F39_RNAi	CG6194-722R41_RNAi	703	TAATACGACTCACTATAGGCTTTCCAAGTTGACCGACGA	TAATACGACTCACTATAGGACCACAATCTCATCGATCTGCT	CG6194-919F41_RNAi_2	CG6194-1626R39_RNAi_2	TAATACGACTCACTATAGGTTCGCTCAAGGACTCATCTGTC	TAATACGACTCACTATAGGTTTGCTGGCCTTAAGCTTCC	0.00263335	increased	0.954746	NS
	RpS5	RpS5-366F_RNAi	RpS5-656R_RNAi	290	TAATACGACTCACTATAGGGATCATTCATCTGCTCACCGG	TAATACGACTCACTATAGGTCATCCTTCTTCTTGATGGCG	RpS5-1F_RNAi	RpS5-334R_RNAi	TAATACGACTCACTATAGGATGGCCGAAGTTGCTGAAAA	TAATACGACTCACTATAGGTCAGCTTCTTGCCGTTGTTG	0.003	increased	0.0155848	increased
	RpLP1(RpP2)	RpP2-43F40_RNAi	RpP2-194R40_RNAi	151	TAATACGACTCACTATAGGATCCTCGTCGATGACGATGTC	TAATACGACTCACTATAGGCGATGTTGGTGATCAGGTCCT	RpP2-333F39_RNAi_2	RpP2-589R39_RNAi_2	TAATACGACTCACTATAGGACATCGGATCCGGAGTTGGT	TAATACGACTCACTATAGGAAAAACGTGTACGCAGGTCG	0.00317411	increased	0.00244505	increased
	CG8055 (Vps32)	CG8055-77F40_RNAi	CG8055-688R41_RNAi	611	TAATACGACTCACTATAGGGCGAGACGGAGAACATGCTTA	TAATACGACTCACTATAGGTGGACCAGGATAAAAGCTGCTT					0.00320864	decreased	Boutrous et al. 2004**
	Tbp-1	Tbp-1-131F40_RNAi	Tbp-1-835R41_RNAi	704	TAATACGACTCACTATAGGTGAAGAGCGAAGTGATACGCA	TAATACGACTCACTATAGGCGTCCAACTCGTCAATGAAGAT					0.00363599	decreased	Boutrous et al. 2004**
	Hr78	Hr78-85F41_RNAi	Hr78-785R40_RNAi	700	TAATACGACTCACTATAGGGTAATGGCTCGTCCACCTACCT	TAATACGACTCACTATAGGCACATGAAAGGCACACTGCAC	Hr78-871F40_RNAi_2	Hr78-1533R39_RNAi_2	TAATACGACTCACTATAGGCCCTTCGAAAGGTTCCAGTTT	TAATACGACTCACTATAGGACATGTATTGCCCGCACTTG	0.00393707	decreased	0.0519748	increased
	bun	bun-36F40_RNAi	bun-454R40_RNAi	418	TAATACGACTCACTATAGGCGAGGAGGTGGAAGTGCTAAA	TAATACGACTCACTATAGGCATTGGCTGTGACTACCGATG	bun-628F40_RNA_2	bun-1055R39_RNAi_2	TAATACGACTCACTATAGGAGCAGCGAAAGTATTAGGCCA	TAATACGACTCACTATAGGAACAACGTGGAAACAAACGG	0.00432061	decreased	0.380362	NS
	Gp150	Gp150-43F39_RNAi	Gp150-745R41_RNAi	702	TAATACGACTCACTATAGGTTTACCCTGGCCCTAATCCA	TAATACGACTCACTATAGGCAGATAGCTGTTGACATTCCGG	Gp150-970F39_RNAi_2	Gp150-1670R41_RNAi_2	TAATACGACTCACTATAGGCTTGACGGATGTTGGTTTGG	TAATACGACTCACTATAGGACTGTAGCTCAAGAAGCCATCG	0.00449764	increased	0.0319306	decreased
	CG30116	CG30116-796F41_RNAi	CG30116-1506R41_RNAi	710	TAATACGACTCACTATAGGCTCACCATGAACCTTTCCACAG	TAATACGACTCACTATAGGCCGTAACAATATCGCAATCCAG	CG30116-1660F41_RNAi_2	CG30116-2378R40_RNAi_2	TAATACGACTCACTATAGGCAAAGCTAAAGATACCGCCACA	TAATACGACTCACTATAGGAGCAGGAAGTCGAAGTTGCAG	0.0045261	decreased	0.421677	NS
	chrw	chrw-59F39_RNAi	chrw-463R40_RNAi	404	TAATACGACTCACTATAGGACACGTTTGGTCATCCGCTA	TAATACGACTCACTATAGGTCGGTGGAGGTTTCGAAGTAG	chrw-638F_RNAi	chrw-638F_RNAi	TAATACGACTCACTATAGGAAATGCAGCGTTCCGTCTG	TAATACGACTCACTATAGGGCTGCTTTTGGTCTTTGCG	0.00540813	decreased	0.249923	NS
	CG13784	CG13784CM 1F rnai	CG13784CM 150R rnai	149	TAATACGACTCACTATAGGGTTTGTGTTGTTGTTTTCGCTTG	TAATACGACTCACTATAGGGTCGCTTGCTGTTGTTTCAA	CG13784CM 151F rnai	CG13784CM 392R rnai	TAATACGACTCACTATAGGAGCAATTAGCGAATGAATAATAAACA	TAATACGACTCACTATAGGCAGAAGAGTATTCTCAGCGAGTTG	0.012	decreased	0.021	decreased
	Indy	Indy-48F41_RNAi	Indy-748R40_RNAi	700	TAATACGACTCACTATAGGCAACTTCTTCGCTAACCACTGG	TAATACGACTCACTATAGGAGTCCATCTGTTCGGTGGAGT	Indy-894F39_RNAi_2	Indy-1602R40_RNAi_2	TAATACGACTCACTATAGGTGTCGCCAAAAAGGTTATCG	TAATACGACTCACTATAGGGATGGTAATGATGGTCGGACC	0.0070814	decreased	0.00506741	decreased
	Kap-alpha3	Kap-alpha3-190F41_RNAi	Kap-alpha3-895R40_RNAi	705	TAATACGACTCACTATAGGCTCGTCCATTGACCTGAAGAAG	TAATACGACTCACTATAGGTGTACCTTGACCTCGCTGTTG					0.00742648	decreased	Boutrous et al. 2004**
	botv_CG15110	botv_CG15110-805F39_RNAi	botv_CG15110-1505R40_RNAi	700	TAATACGACTCACTATAGGATCCGGATGAGCATAGCGTT	TAATACGACTCACTATAGGACCACATAGCGTCCAATCTGG	botv-1606F41_RNAi_2	botv-2306R41_RNAi_2	TAATACGACTCACTATAGGCACTACTGCTACCGAAAGCTCG	TAATACGACTCACTATAGGAACTGGTACTCCAATATCCGGC	0.00887549	decreased	0.158544	NS
	RpS6	RpS6-6F40_RNAi	RpS6-372R40_RNAi	366	TAATACGACTCACTATAGGACAGGTTGTGGAGGCCGATAT	TAATACGACTCACTATAGGCGCACATCATCTTCCTTGCTC	RpS6-436F39_RNAi_2	RpS6-669R40_RNAi_2	TAATACGACTCACTATAGGCAAAATTCAGCGCCTGATCA	TAATACGACTCACTATAGGTGTCGCGGTGTTTACTTCTTG	0.0091777	increased	0.13449	increased
	CG11455	CG11455-1F41_RNAi	CG11455-275R40_RNAi	274	TAATACGACTCACTATAGGATGTCGCTTACCCCCTTTCTAC	TAATACGACTCACTATAGGATTCTTGTCCCTTACGCTCCC					0.00988092
	Kai-RIA	Kai-RIA-936F41_RNAi	Kai-RIA-1640R40_RNAi	704	TAATACGACTCACTATAGGCCTATGATGCGGTACGTGTCAT	TAATACGACTCACTATAGGTGGAGCCTTCTGTGGTTTCAC	Kai_RIA-161F40_RNAi_2	Kai_RIA-866R39_RNAi_2	TAATACGACTCACTATAGGCACGCCATATCGGTGGTAAAC	TAATACGACTCACTATAGGTGGTGCAGCTTTTCCATCAG	0.0102644		0.0783075	NS
	cib	cib-21F40_RNAi	cib-277R41_RNAi	256	TAATACGACTCACTATAGGACTCAAGGATCTGCCCAAGGT	TAATACGACTCACTATAGGGGCGATGAACTGATTCTTCTCC					0.0105691	decreased
	CG14722	CG14722-36F41_RNAi	CG14722-759R39_RNAi	723	TAATACGACTCACTATAGGCCGACGAAGACGAACTAGATGA	TAATACGACTCACTATAGGAGAACGTGCAGCGTGTTGAT					0.0110776	decreased
	loco	loco-444F40_RNAi	loco-1145R40_RNAi	701	TAATACGACTCACTATAGGATCGTCTGCTGGAATCTGAGG	TAATACGACTCACTATAGGTCCCACTGTTTCTCCAGGTCT					0.0113043	decreased
	CG12164	CG12164-41F39_RNAi	CG12164-566R41_RNAi	525	TAATACGACTCACTATAGGTGCGCGCTAATCATAAGCTT	TAATACGACTCACTATAGGCAGAGATCGTGGCTGGTGTACT	CG12164-757F40_RNAi_2	CG12164-1183R40_RNAi_2	TAATACGACTCACTATAGGCCCGTGAAGAAACAAATCTGG	TAATACGACTCACTATAGGACAAAATGCAGGAGGAAGTGG	0.0119917	decreased	0.230438	NS
	CG1475 (RpL13A)	CG1475-22F_RNAi	CG1475-329R_RNAi	307	TAATACGACTCACTATAGGACCGTTGTTATTGATGGTCGC	TAATACGACTCACTATAGGATGCCGTCGAACACACGTAGA	CG1475-309F_RNAi	CG1475-547R_RNAi	TAATACGACTCACTATAGGTCTACGTGTGTTCGACGGCAT	TAATACGACTCACTATAGGCCTTGACCGTCAGCTTCTTCA	0.012	increased	0.011	increased
	cact	cact-130F39_RNAi	cact-832R40_RNAi	702	TAATACGACTCACTATAGGACTAGCGGTAAAATTGGCGG	TAATACGACTCACTATAGGAGTAAGAGCGGCCAGATGAAG	cact-1020F40_RNAi_2	cact-1527R40_RNAi_2	TAATACGACTCACTATAGGCACAGCTCTGCATCTTTCCTG	TAATACGACTCACTATAGGTGTCGTAATCACTGTCCGGAG	0.0134946	increased	0.14625	NS
	CG13189	CG13189-200F40_RNAi	CG13189-914R41_RNAi	714	TAATACGACTCACTATAGGCCGAGAGTTCCCATTTGTACG	TAATACGACTCACTATAGGACAATGTATATCATGGCTCCGG	CG13189-44F39_RNAi_2	CG13189-606R40_RNAi_2	TAATACGACTCACTATAGGTCAGCGGCTCATTCATCACT	TAATACGACTCACTATAGGAGGCTGCTATCATTACGCCAG	0.0138738	increased	0.645312	NS
	CG5254	CG5254-170F40_RNAi	CG5254-880R41_RNAi	710	TAATACGACTCACTATAGGAGGTGCACTACAATGGCGTCT	TAATACGACTCACTATAGGAGACCAGCAGCAGAATAGCTCC					0.0140177	decreased
	CG32549	CG32549-17F41_RNAi	CG32549-717R40_RNAi	700	TAATACGACTCACTATAGGAGATCCTGCAGTTCGAGTACGA	TAATACGACTCACTATAGGGATCTTCAGGCTTCCGGTCTT					0.0141118	decreased	0.214153	NS
	CG1956	CG1956-2F40_RNAi	CG1956-527R41_RNAi	525	TAATACGACTCACTATAGGTGCGTGAGTACAAAATCGTGG	TAATACGACTCACTATAGGGGCTTCTTCTGTTTCTTCTCGG	CG1956-1015F39_ RNAi_2	CG1956-1518R40_RNAi_2	TAATACGACTCACTATAGGAAAGCCCAACCAACAACAAG	TAATACGACTCACTATAGGTTACCAGGAAGCGGAAATGAG	0.0142318	decreased	0.214153	NS
	CG11621	CG11621-127F40_RNAi	CG11621-845R41_RNAi	718	TAATACGACTCACTATAGGTATCAGCAAAGCTCCACCGTT	TAATACGACTCACTATAGGCTTGTTGTCGGTGCTGTTTGTT					0.0144529	decreased
	CG6950	CG6950-283F40_RNAi	CG6950-985R41_RNAi	702	TAATACGACTCACTATAGGCATCAGTACACTCGCGGTTACG	TAATACGACTCACTATAGGTTCTACCTCGAAACTGCGTGC	CG6950-1050F40_RNAi_2	CG6950-1366R39_RNAi_2	TAATACGACTCACTATAGGGTGACTTCATGGCCAAGTTCC	TAATACGACTCACTATAGGGTCCGGCGACTATTTCCATT	0.0157607	decreased	0.0574912	NS
	CG14213	CG14213-150F40_RNAi	CG14213-852R40_RNAi	702	TAATACGACTCACTATAGGTAAGCAAGAAGCGTGAGACGG	TAATACGACTCACTATAGGTGCTTGGTCGACTTGTCCTCT					0.0158298	decreased
	CG1600	CG1600-159F40_RNAi	CG1600-838R40_RNAi	679	TAATACGACTCACTATAGGCAACTCCATCACCAGCATGTC	TAATACGACTCACTATAGGTGTGCCAAAGTCAATGACCAC	CG1600-915F40_RNAi_2	CG1600-1494R39_RNAi_2	TAATACGACTCACTATAGGAGAAGCTGCTGCCCAAGTTCT	TAATACGACTCACTATAGGCCGAATTTTGACTCCGGCTA	0.0158744	increased	0.655981	NS
	CG14206	CG14206-1F39_RNAi	CG14206-182R41_RNAi	181	TAATACGACTCACTATAGGATGTTTATGCCAAAGGCCCA	TAATACGACTCACTATAGGGCGAACTGCTCCTTAACCAGTC	CG14206-164F_RNAi	CG14206-426R_RNAi	TAATACGACTCACTATAGGTGGTTAAGGAGCAGTTCGCCT	TAATACGACTCACTATAGGTCCAACATCGCCCTTCTTG	0.0159986	decreased	0.0123103	increased
	CG12334 (Atg8b)	CG12334-15F41_RNAi	CG12334-302R40_RNAi	287	TAATACGACTCACTATAGGCCAGTACAAGAAGGACCACTCG	TAATACGACTCACTATAGGAAGTGCTCCTGGTACAGTGCA					0.0162822	decreased
	CG7806	CG7806-62F39_RNAi	CG7806-766R41_RNAi	704	TAATACGACTCACTATAGGGATTGAAACCGTTCGCCAAC	TAATACGACTCACTATAGGTCTTTCTCAGCTTTCCAGCCAC					0.0165533	decreased
	CG13695	CG13695-48F40_RNAi	CG13695-609R41_RNAi	561	TAATACGACTCACTATAGGTATCGTCTCGCTGCTCCTTGT	TAATACGACTCACTATAGGTGAGCTTCATCAGCTTCTTGGA					0.0168441	decreased
	CG9934	CG9934-455F39_RNAi	CG9934-1156R39_RNAi	701	TAATACGACTCACTATAGGCGACACCAATGCAAGATGTG	TAATACGACTCACTATAGGTCATTCGCATCACCTGTTCA					0.0180349	decreased
	CG6231	CG6231-388F39_RNAi	CG6231-1103R40_RNAi	715	TAATACGACTCACTATAGGTCTTTATTGGCTCCGTGGTG	TAATACGACTCACTATAGGTCAGCGAGAACATGATGAAGG					0.0182542	decreased
	CG17299	CG17299-95F41_RNAi	CG17299-802R41_RNAi	707	TAATACGACTCACTATAGGCCAGCTTCTTGTAAAGAAGGCC	TAATACGACTCACTATAGGTCCATGATCGTGTAGAGCGATT					0.018315	decreased
	CG3571	CG3571-93F40_RNAi	CG3571-802R39_RNAi	709	TAATACGACTCACTATAGGTCGGATCAAGGAGATCACCAT	TAATACGACTCACTATAGGAAATCTCGACCGTGCTCACA	CG3571-897F39_RNAi_2	CG3571-1550R40_RNAi_2	TAATACGACTCACTATAGGACGCCTTTGGTGGATTCAAT	TAATACGACTCACTATAGGCGGCATAAAGGTCCATTTGTC	0.0196995	decreased	0.0590951	NS
	CG15797	CG15797-14F40_RNAi	CG15797-726R40_RNAi	712	TAATACGACTCACTATAGGACCTGAAACGACTAGAGGCCA	TAATACGACTCACTATAGGCTGGTCACGTTGAACATCACC					0.0198415	decreased
	cpo	cpo com 103F rnai	cpo com 547R rnai	444	TAATACGACTCACTATAGGCGAACCGCAACTGCAACT	TAATACGACTCACTATAGGGAAGCTCAGCTGGTGGTGGT	cpo com 951F rnai_2	cpo com 1068R rnai_2	TAATACGACTCACTATAGGACACCAGTGCAGGAGCAG	TAATACGACTCACTATAGGGACTCGTGCGAGTGCGATT	0.04	decreased	0.986	NS
	Anxb11	Anxb11-29F39_RNAi	Anxb11-733R40_RNAi	704	TAATACGACTCACTATAGGACTTCGATGCCGTCAAGGAT	TAATACGACTCACTATAGGTTGGTGACGCACCTGTAGATG					0.0199675	decreased
	CG32016	CG32016-606F40_RNAi	CG32016-1308R39_RNAi	702	TAATACGACTCACTATAGGTCCCACGGTAACTCTCCAACT	TAATACGACTCACTATAGGACATTACCGGAATCGGAGCT	CG32016-47F39_RNAi_2	CG32016-459R40_RNAi_2	TAATACGACTCACTATAGGTAGCCGATGGTTTCGACAAA	TAATACGACTCACTATAGGACTAGTTGGCATGGTTGGCAC	0.0202788	decreased	0.00605146	decreased
	CG1907	CG1907-44F39_RNAi	CG1907-760R40_RNAi	716	TAATACGACTCACTATAGGCCACCAATGCCATCAAGTTC	TAATACGACTCACTATAGGGCCATCGACCATCTTCATGTT					0.0210986	decreased
	HmgD	HmgD-8F40_RNAi	HmgD-341R40_RNAi	333	TAATACGACTCACTATAGGATAAGCCAAAACGCCCACTCT	TAATACGACTCACTATAGGACTCGCTCTCATCATCGTCGT	HmgD-402F39_RNAi_2	HmgD-905R39_RNAi_2	TAATACGACTCACTATAGGCCGCAAGCAAACAAGAACAC	TAATACGACTCACTATAGGCCACCCGATCTTCGATCAAT	0.0211978	decreased	0.023978	decreased
	Drongo	drongo-199F41_RNAi	drongo-903R41_RNAi	704	TAATACGACTCACTATAGGGTCAACCTGAAGTCGTCTGCTC	TAATACGACTCACTATAGGTGCTCGTCGAGATCCTTAAGAG	Drongo-937F39_RNAi_2	Drongo-1357R39_RNAi_2	TAATACGACTCACTATAGGCAATGGCAATGGTCATCAGG	TAATACGACTCACTATAGGTGCCGTAGGCATTTGGTATG	0.0212338	decreased	0.527756	NS
	Eip63E	Eip63E-40F40_RNAi	Eip63E-747R40_RNAi	707	TAATACGACTCACTATAGGTCCAGAGACAGCTTTCCGTGT	TAATACGACTCACTATAGGACCATAACGTGACCACCTCGT					0.0213799	decreased
	CG32000	CG32000-10F40_RNAi	CG32000-534R39_RNAi	524	TAATACGACTCACTATAGGTGCGGTTATCGACGTTCTCTT	TAATACGACTCACTATAGGCTCCGAAAACAATTCGCCTT	CG32000-798F39_RNAi_2	CG32000-1338R39_RNAi_2	TAATACGACTCACTATAGGTAAAGAGCTTCCAACGCGAG	TAATACGACTCACTATAGGAATCGACCGACTGTCATTGC	0.0214663	decreased	0.144393	NS
	bigmax	bigmax-28F39_RNAi	bigmax-731R41_RNAi	703	TAATACGACTCACTATAGGACCAAGGAAGACGTTTTCGG	TAATACGACTCACTATAGGTTCCTGTTTTTCCATAGCCTCC					0.0219665	decreased
	CG2206	CG2206-373F40_RNAi	CG2206-1077R41_RNAi	704	TAATACGACTCACTATAGGAGGATCTCATCGCGCTATCAG	TAATACGACTCACTATAGGCATGTCGGAGTCTACGAACCTG					0.0221166	decreased
	CG31374	CG31374-11F40_RNAi	CG31374-726R39_RNAi	715	TAATACGACTCACTATAGGTCCTGACGTGCAAGTCGATAA	TAATACGACTCACTATAGGTTCGAGCAACTGAATCTGGC	CG31374-755F40_RNAi_2	CG31374-1458R39_RNAi_2	TAATACGACTCACTATAGGGCGACACCAAGCACTAACAGA	TAATACGACTCACTATAGGTGGAGCAGCACATTGCACTT	0.0222167	decreased	0.352495	NS
	CG1213	CG1213-80F41_RNAi	CG1213-805R40_RNAi	725	TAATACGACTCACTATAGGGAAACACTCGAACGATGTCACC	TAATACGACTCACTATAGGTCCTCTACATTGGCCTGGATC					0.023947	decreased
	bwa	bwa-84F40_RNAi	bwa-784R41_RNAi	700	TAATACGACTCACTATAGGCTGGTGCGAAGGCAACTACTT	TAATACGACTCACTATAGGCGTTCTTTGGCCAGTACTTCAG					0.0263385	decreased
	Myo31DF	Myo31DF-134F39_RNAi	Myo31DF-836R39_RNAi	702	TAATACGACTCACTATAGGTGCGTCTCGATGAATCCCTA	TAATACGACTCACTATAGGTTTCCCAGATGCAAGACAGC	Myo31DF-2099F40_RNAi_2	Myo31DF-2801R41_RNAi_2	TAATACGACTCACTATAGGTGATCCCACATATTGTGACGC	TAATACGACTCACTATAGGTGTTTTTCGACGAGTGGAAGAC	0.0264851	decreased	0.38888	NS
	CG11066	CG11066-282F41_RNAi	CG11066-995R40_RNAi	713	TAATACGACTCACTATAGGTCAGTGCCTGAACGGATATTTC	TAATACGACTCACTATAGGAAAGATCTGAGGCGACAGCTG					0.0265829	decreased
	CG11534	CG11534-52F39_RNAi	CG11534-753R41_RNAi	701	TAATACGACTCACTATAGGTTGATTAACGAGAGCGCCAG	TAATACGACTCACTATAGGTATATTTAGCATCGTCCCGCAC					0.0274972	decreased
	CG15118	CG15118-321F40_RNAi	CG15118-1022R39_RNAi	701	TAATACGACTCACTATAGGGAGCCAACGTCCGGATAGATA	TAATACGACTCACTATAGGCAACATCCCTTCCGTGAAGA	CG15118-1152F41_RNAi_2	CG15118-1857R40_RNAi_2	TAATACGACTCACTATAGGCACATGTGTCCAAGCTGAGAGA	TAATACGACTCACTATAGGAGCCCGAAGGTTACACTTGAA	0.0280583	decreased	0.623124	NS
	CG10967	CG10967-548F40_RNAi	CG10967-1249R41_RNAi	701	TAATACGACTCACTATAGGTGCGGCTCTCCCATGTATATG	TAATACGACTCACTATAGGTGATTTTGTTGCTGCTGTGGAC	CG10967-1244F39_RNAi_2	CG10967-1953R41_RNAi_2	TAATACGACTCACTATAGGAAATCAATCCAGTCCGCCAC	TAATACGACTCACTATAGGCTTCCTGGATACAATCGGTGAG	0.0282969	increased	0.470764	NS
	CG1607	CG1607-458F41_RNAi	CG1607-1161R39_RNAi	703	TAATACGACTCACTATAGGAGTACCTACGTCCTGAAGCCCT	TAATACGACTCACTATAGGACATCGATAGAAGCGCCATG	CG1607-1192F41_RNAi_2	CG1607-1602R40_RNAi_2	TAATACGACTCACTATAGGTGATTAACTACGTCGGCTTTGC	TAATACGACTCACTATAGGTTCGTCTGCTTTCCGAGTACC	0.0283352	decreased	0.977709	NS
	Hsf	Hsf-34F39_RNAi	Hsf-741R40_RNAi	707	TAATACGACTCACTATAGGCAGTTCAAGCACGAATCGGA	TAATACGACTCACTATAGGTGTTGATCATCAGCTGCACGT	Hsf-1087F41_RNAi_2	Hsf-1793R39_RNAi_2	TAATACGACTCACTATAGGATGTCTACACAGTCACCGAGGC	TAATACGACTCACTATAGGCTTGCATGCTTTCCAAGTGC	0.0283622	decreased	0.17867	NS
	CG10237	CG10237-234F40_RNAi	CG10237-904R40_RNAi	670	TAATACGACTCACTATAGGCCTGCAAGTATTACCCGGAAA	TAATACGACTCACTATAGGAGCCGTACGAGTTGATGGTGT	CG10237-53F41_RNAi_2	CG10237-354R40_RNAi	TAATACGACTCACTATAGGGAGTTCCGAAGGATTTCCACTG	TAATACGACTCACTATAGGTGATCAGCCACTCCTCGTTTC	0.0296269	decreased	0.121571	NS
	rn	rn-42F39_RNAi	rn-751R41_RNAi	709	TAATACGACTCACTATAGGTCCTCACTCGAATCCGCATA	TAATACGACTCACTATAGGGCCGGAGTTATTCTCCTGACTT	rn Zn finger-2320F_RNAi	rn Zn finger-2696R_RNAi	TAATACGACTCACTATAGGCCGTTCAAGTGCAACTCCTGCT	TAATACGACTCACTATAGGTCCGGACTTACCTTTGGCCAGT	0.0314918	decreased
	CG17026	CG17026-8F41_RNAi	CG17026-710R40_RNAi	702	TAATACGACTCACTATAGGCCAGTAAGTCCCAGATCGAGGA	TAATACGACTCACTATAGGCACGGATGAGCAAATAGCCAG					0.0319579	decreased
	CG11251	CG11251-4F_RNAi	CG11251-425R_RNAi	421	TAATACGACTCACTATAGGCCTGCCTTTATGCACCTCCTT	TAATACGACTCACTATAGGACATAGTTGCAGTCCACGCCA	CG11251-463F_RNAi	CG11251-940R_RNAi	TAATACGACTCACTATAGGGAGCCGAGTTTTCACGTCAAG	TAATACGACTCACTATAGGTCAAAAAGCACGACGGATGA	0.032	decreased	0.0837534	NS
	SH3PX1	SH3PX1-341F40_RNAi	SH3PX1-1047R22_RNAi	706	TAATACGACTCACTATAGGCGTACTCGGAAATTGGTCCAG	TAATACGACTCACTATAGGCAGTAGTTGACGCCCATGTAGG	SH3PX1-1118F_RNAi	SH3PX1-1606R_RNAi	TAATACGACTCACTATAGGTCATACACAGCATGGACGTGG	TAATACGACTCACTATAGGTCAAATGCGTATCCCGCTC	0.0323374	increased	0.000139309	increased
	Hsp22	Hsp22-238F40_RNAi	Hsp22-744R39_RNAi	506	TAATACGACTCACTATAGGGTTCCTTACCGATGTTTTGGC	TAATACGACTCACTATAGGCTTTGTCATTTGGCTCCTCG					0.0325875	decreased
	CG8596	CG8596-318F41_RNAi	CG8596-1025R40_RNAi	707	TAATACGACTCACTATAGGCACTGCTGCTATCGCTGTCTCT	TAATACGACTCACTATAGGCAGATGAGCACATAACGCTCG					0.0326625	decreased
	CG1640	CG1640-512F40_RNAi	CG1640-1223R40_RNAi	711	TAATACGACTCACTATAGGTGCTGGATTCACCCGATTATC	TAATACGACTCACTATAGGTGAGAACCTCCATGTAACCGC					0.0326719	decreased
	CG7466	CG7466-5888F39_RNAi	CG7466-6598R39_RNAi	710	TAATACGACTCACTATAGGAATCACAATGGCACCCTGGT	TAATACGACTCACTATAGGTTCCTGCTTGTGCTCCAATG	CG7466-4177F41_RNAi_2	CG7466-4878R41_RNAi_2	TAATACGACTCACTATAGGGCCAGCCTGGAGGTAAAAGAGT	TAATACGACTCACTATAGGTTGTCGGAAATCGTTGAGAGGT	0.0332645	decreased	0.0244269	decreased
	CG6766	CG6766-119F40_RNAi	CG6766-829R39_RNAi	710	TAATACGACTCACTATAGGAAGTGCCGGATTTAGATGTGC	TAATACGACTCACTATAGGTCGGATTCAACCCATTCCTT					0.033422	decreased
	Ntf-2-	Ntf-2-11F40_RNAi	Ntf-2-362R39_RNAi	351	TAATACGACTCACTATAGGATCCGCAGTACGAGGACATTG	TAATACGACTCACTATAGGACAAAGAAGGTGCCTGCGTT					0.0336905	decreased
	CG18228	CG18228-43F_RNAi	CG18228-325R_RNAi	282	TAATACGACTCACTATAGGAAAGCCCGTGTGCTATGGAAA	TAATACGACTCACTATAGGTGCGGTCACAAGCACTGAGTT	CG18228-375F_RNAi	CG18228-658R_RNAi	TAATACGACTCACTATAGGAAGAGACCAAGAACCCGTCGA	TAATACGACTCACTATAGGTGCCAGTGGCGTCAGGAATAT	0.034	decreased	0.141808	NS
	CG33113	CG33113 -all-16F_RNAi	CG33113 -all-286R_RNAi	270	TAATACGACTCACTATAGGACTGGCGCGATGTGAAGAAAT	TAATACGACTCACTATAGGTTGATATGTGCCACAGCCACG	CG33113 -all-307F_RNAi	CG33113 -all-589R_RNAi	TAATACGACTCACTATAGGGGCGTCTGTTTCTTGTTGAGG	TAATACGACTCACTATAGGTTGTCCTTCTCAGACTCGGCA	0.034	decreased	0.40061	decreased
	CG12715	CG12715-245F39_RNAi	CG12715-954R39_RNAi	709	TAATACGACTCACTATAGGGAACTGTTGCGGAGCAAAGA	TAATACGACTCACTATAGGTCGTGATCTGCGGTCTCATT					0.0342586	decreased
	Rab-RP4	Rab-RP4-64F39_RNAi	Rab-RP4-600R41_RNAi	536	TAATACGACTCACTATAGGTTTGATACGTCGCTTCGTGG	TAATACGACTCACTATAGGAACAGTAACACGTAGACGCGCT					0.0343789	decreased
	drpr	drpr-570F40_RNAi	drpr-1280R40_RNAi	710	TAATACGACTCACTATAGGTTGTGTGTGCAGGAGTGGCTA	TAATACGACTCACTATAGGTCATGTTCTTCACGTTGCTGG					0.0348003	decreased
	eIF-4G	eIF-4G-2202F40_RNAi	eIF-4G-2903R40_RNAi	701	TAATACGACTCACTATAGGCGATACGGTGAATCTCGTTCA	TAATACGACTCACTATAGGTGATGTTTGCTGCTCACTTCC					0.0348849	decreased
	Ag5r	Ag5r-2F39_RNAi	Ag5r-711R40_RNAi	709	TAATACGACTCACTATAGGTGCGCAACTTCGTGATCATA	TAATACGACTCACTATAGGTTGGTACCGGTGGTACACTTG					0.0353423	decreased
	CG5810	CG5810-89F39_RNAi	CG5810-789R41_RNAi	700	TAATACGACTCACTATAGGTTGATAGTTTGGATTGCCGC	TAATACGACTCACTATAGGTGACTCGAGATCACAATTGGTG	CG5810-791F39_RNAi_2	CG5810-1204R41_RNAi_2	TAATACGACTCACTATAGGTGGATGGTCGAGTGATTGGT	TAATACGACTCACTATAGGGTTCGACGAACTCCAACAGATC	0.0360208	decreased	0.816652	NS
	ERp60	ERp60-297F41_RNAi	ERp60-1001R40_RNAi	704	TAATACGACTCACTATAGGCCGAGTCCGATCTGTCTACCTT	TAATACGACTCACTATAGGTC CGTTGTAGCTGACTGGCTT	ERp60-14F39_RNAi_2	ERp60-470R41_RNAi_2	TAATACGACTCACTATAGGAAGCGATTGAAGCCCGAGTA	TAATACGACTCACTATAGGGGCACGAATAAGCACAATCTTG	0.0361528	decreased	0.0904763	NS
	CG8089	CG8089-181F41_RNAi	CG8089-881R39_RNAi	700	TAATACGACTCACTATAGGACGGATTTCTCCAGCGAGTTAT	TAATACGACTCACTATAGGTGAGCGCAACTTGGACATTT	CG8089-906F40_RNAi_2	CG8089-1485R41_RNAi_2	TAATACGACTCACTATAGGCCAGCTGCATATGGTTAAGCA	TAATACGACTCACTATAGGCAGATCGCAAACTTCACACTGA	0.0363966	decreased	0.277504	NS
	CG12063	CG12063-509F39_RNAi	CG12063-1222R41_RNAi	713	TAATACGACTCACTATAGGTCTTGCAGCGCGGTTAATTA	TAATACGACTCACTATAGGTCTTGGTTATCATCTCACCGGA					0.036769	decreased
	CG30197	CG30197-10F41_RNAi	CG30197-312R39_RNAi	302	TAATACGACTCACTATAGGTAAGCTCGGCTTTCTTTCACTG	TAATACGACTCACTATAGGTTCGCATTTCTCAAAGCTGC	CG30197-142F_RNAi	CG33113 -all-589R_RNAi	TAATACGACTCACTATAGGGGCGTCTGTTTCTTGTTGAGG	TAATACGACTCACTATAGGTTGTCCTTCTCAGACTCGGCA	0.0375791	decreased	0.230598	NS
	CG9373	CG9373-195F40_RNAi	CG9373-895R39_RNAi	700	TAATACGACTCACTATAGGATACGACTACCGTTGGCAGGA	TAATACGACTCACTATAGGATCTGACGATCCAGCATGGA					0.0376555	decreased
	CG31363	CG31363-not RB-80F_RNAi	CG31363-not RB-252R_RNAi	172	TAATACGACTCACTATAGGCGGCAAGAACCACATGAAGAG	TAATACGACTCACTATAGGTCGAGCCACTGTTCATCTTGA	CG31363-RBonly-2F_RNAi	CG31363-RBonly-352R_RNAi	TAATACGACTCACTATAGGTGAGCACAAGACCAGACACCA	TAATACGACTCACTATAGGTCGGATTGCGTGAATCGAG	0.038	decreased	0.157516	NS
	CG4141	CG4141-313F39_RNAi	CG4141-1013R40_RNAi	700	TAATACGACTCACTATAGGCCTTACACCGACGAAACGAA	TAATACGACTCACTATAGGATCGACTTGTGGAG GTGGACT					0.0382894	decreased
	CG5489 (Atg7)	CG5489-18F40_RNAi	CG5489-742R40_RNAi	724	TAATACGACTCACTATAGGCCATTGAAGTTTCTTGGCCTG	TAATACGACTCACTATAGGAAGCCTAAAGCTGCGTTGATG					0.038665	decreased
	CG3811	CG3811-242F41_RNAi	CG3811-942R40_RNAi	700	TAATACGACTCACTATAGGATAGATGCGGCCCTAGATCATG	TAATACGACTCACTATAGGAGACAGTTATCCTCGCGCAGT					0.0396427	decreased
	p53	p53-177F40_RNAi	p53-881R41_RNAi	704	TAATACGACTCACTATAGGGACATTCAGATCCAGGCGAAC	TAATACGACTCACTATAGGCGTGTCCTCCGTCTTTATAGCA					0.0400911	decreased
	CG1621	CG1621-313F40_RNAi	CG1621-1013R40_RNAi	700	TAATACGACTCACTATAGGTAACCTGTCCAATGAGACGCC	TAATACGACTCACTATAGGTGTCCAATCTTTGC AGGAAGG					0.0400924	decreased
	CG5171	CG5171-80F40_RNAi	CG5171-793R39_RNAi	713	TAATACGACTCACTATAGGTCTGAAAGTCCAGTTGCCGTA	TAATACGACTCACTATAGGTCGGTCATTACAGCCTGCTT	CG5171-7F39_RNAi_2	CG5171-418R41_RNAi_2	TAATACGACTCACTATAGGACCGCCGACGGATCATTATA	TAATACGACTCACTATAGGTGTCGCGTTTAGAAGTAATGCC	0.0401222	decreased	0.0984909	NS
	CG33209	CG33209-108F39_RNAi	CG33209-808R41_RNAi	700	TAATACGACTCACTATAGGAGGCCTTAATGGCAATGCAA	TAATACGACTCACTATAGGACTCGCTATGTTCGTCTCCACC					0.0403146	decreased
	Chit	Chit-183F41_RNAi	Chit-889R41_RNAi	706	TAATACGACTCACTATAGGGCGACTATCTGGTCTACGGCTA	TAATACGACTCACTATAGGCGCAACCAGTACTTCACCTGA	Chit-942F39_RNAi_2	Chit-1417R41_RNAi_2	TAATACGACTCACTATAGGCCATGGAAACTGACCGATGA	TAATACGACTCACTATAGGGCATTTTCTTCACATGGTCAGC	0.0405837	decreased	0.166457	NS
	Cat	Cat-106F39_RNAi	Cat-816R41_RNAi	710	TAATACGACTCACTATAGGAATCAAGGATGCCTCCCAGA	TAATACGACTCACTATAGGTTGCAGGTCTTGATCCTGTTGT					0.0408858	decreased
	CG18212	CG18212-500F40_RNAi	CG18212-1207R39_RNAi	707	TAATACGACTCACTATAGGCTGTTGCTGTTAAGCCTGCAG	TAATACGACTCACTATAGGCCTTGCCTTGCAACTTATCG					0.0411823	increased
	CG33104	CG33104-67F39_RNAi	CG33104-627R40_RNAi	560	TAATACGACTCACTATAGGTTCCACATATCGGAGACGGA	TAATACGACTCACTATAGGCTCTTGAGATGACGCATCTGC	CG33104-607F40_RNAi_2	CG33104-807R41_RNAi_2	TAATACGACTCACTATAGGGCAGATGCGTCATCTCAAGAG	TAATACGACTCACTATAGGCTAGAAGTGCTTGGAGTCGAGG	0.0423105	decreased	0.0635116	NS
	CG7219	CG7219-32F40_RNAi	CG7219-757R41_RNAi	725	TAATACGACTCACTATAGGTGAGTTCGGTGTGCTGTGAAT	TAATACGACTCACTATAGGCTCGAAATCCTGAATCTGCAGA	CG7219-850F40_RNAi_2	CG7219-1452R40_RNAi_2	TAATACGACTCACTATAGGGCAGACCACCAGGATGATTCT	TAATACGACTCACTATAGGTCGTTGACGGTGAAGTCCACT	0.0433656	decreased	0.495253	NS
	Toll-4	Toll-4-2303F39_RNAi	Toll-4-3004R40_RNAi	701	TAATACGACTCACTATAGGATTCCGACTCGCTCGCATAT	TAATACGACTCACTATAGGTCTCC AGTCGATCCACGAACT					0.0453936	decreased
	Ics	Ics-8F41_RNAi	Ics-512R39_RNAi	504	TAATACGACTCACTATAGGTCAGATAACGAAATGCGTACCC	TAATACGACTCACTATAGGTATGAACCCGGAATAGCCGA					0.0459048	decreased
	CG12268	CG12268-703F41_RNAi	CG12268-1404R40_RNAi	701	TAATACGACTCACTATAGGAGCTGCCCATAATCATCACAAG	TAATACGACTCACTATAGGAGTATATAGGTGCGCATGCCC					0.0459386	decreased
	PGRP-LA	PGRP-LA-37F40_RNAi	PGRP-LA-493R39_RNAi	456	TAATACGACTCACTATAGGAGCGTCGAAGAACTCTCATGG	TAATACGACTCACTATAGGGCCAGTTCCGGATTTCTTGA	PGRP-LA-6F_RNAi	PGRP-LA-144R_RNAi	TAATACGACTCACTATAGGAACAGCAACAATGCCAATGG	TAATACGACTCACTATAGGCGTAGAGCACAATCAATCCGG	0.0460598	decreased
	CG8678	CG8678-100F40_RNAi	CG8678-807R39_RNAi	707	TAATACGACTCACTATAGGCAAGGTGGAGGAGATATTCGC	TAATACGACTCACTATAGGCAGAATTTTCGGACTTGGCA					0.0465432	decreased
	CG10192	CG10192-3112F41_RNAi	CG10192-3823R41_RNAi	711	TAATACGACTCACTATAGGATATGCAGCTCCACATGGTCAA	TAATACGACTCACTATAGGCGACATCGTCATCTTCATCCTG					0.0465549	decreased
	pk	pk-611F40_RNAi	pk-1315R40_RNAi	704	TAATACGACTCACTATAGGGCAGATACCCGACGACAAAGT	TAATACGACTCACTATAGGCAAGTGTTGCAGGAGAAGCAC	pk-1554F40_RNAi_2	pk-2244R41_RNAi_2	TAATACGACTCACTATAGGCACCAGGCTACCTTCAACCAA	TAATACGACTCACTATAGGTTAGTATGGAGACCGGATGTGG	0.0471058	decreased	0.744279	NS
	CG6361	CG6361-40F41_RNAi	CG6361-752R41_RNAi	712	TAATACGACTCACTATAGGCTCCTGGTGCTGACAACTTCTG	TAATACGACTCACTATAGGGATCACTGCGATCCGTGTAGAG	CG6361-767F39_RNAi_2	CG6361-1168R39_RNAi_2	TAATACGACTCACTATAGGAAATATTTCGTCGCCGGTTG	TAATACGACTCACTATAGGCAAATGACGCCTCAGAAACG	0.0473038	decreased	0.107589	NS
	CG16931	CG16931-83F41_RNAi	CG16931-339R40_RNAi	256	TAATACGACTCACTATAGGCATATCGCTGACTCTGGTTGCT	TAATACGACTCACTATAGGTTCCATACCAGCCCTCATAGC					0.0478385	decreased
	Cnk	cnk-752F40_RNAi	cnk-1452R39_RNAi	700	TAATACGACTCACTATAGGCGACGAGATTGTGCAGATCAA	TAATACGACTCACTATAGGCCTCATGAAACATTCGCCTG					0.0483121	decreased
	msps	msps-558F40_RNAi	msps-1267R39_RNAi	709	TAATACGACTCACTATAGGGCTGGCTGTTGAGATTTACCG	TAATACGACTCACTATAGGACAAGGCCGTTTCGGACTTA					0.048885	decreased
	CG33087	CG33087-3415F40_RNAi	CG33087-4020R39_RNAi	605	TAATACGACTCACTATAGGAGAGTGATAACCACCCGGTGA	TAATACGACTCACTATAGGTGCCTTTAATGTCCTGCCTG	CG33087-6614F41_RNAi_2	CG33087-7130R41_RNAi_2	TAATACGACTCACTATAGGAAGTGGTTCTCCAGACAGAGCA	TAATACGACTCACTATAGGAGTTCAACGCTTCGGATAGTCG	0.0490269	decreased	0.578567	NS
	CG7611	CG7611-311F21_RNAi	CG7611-1019R21_RNAi	708	TAATACGACTCACTATAGGTCGGACAGTATCTGCATGACG	TAATACGACTCACTATAGGTCACAGTGGAGTCTTTGCTGC					0.0499981	decreased
	CG6621	CG6621-616F41_RNAi	CG6621-1323R40_RNAi	707	TAATACGACTCACTATAGGCTCTGAACATGATCGGCATGTT	TAATACGACTCACTATAGGTTCGACGGCTCAGTGCTTATT					0.0506633	NS
	CG32276	CG32276-64F40_RNAi	CG32276-597R40_RNAi	533	TAATACGACTCACTATAGGCGAGAAGGCCAGCAAATATGT	TAATACGACTCACTATAGGGCACTATTTAAAACTGCGCCG					0.0507638	NS
	CG3071	CG3071-219F41_RNAi	CG3071-922R39_RNAi	703	TAATACGACTCACTATAGGTTGTGGTAAAGAACCTTTCCCG	TAATACGACTCACTATAGGTGCTTGATCTCCGTCAGCAA					0.0511758	NS
	CG5346	CG5346-273F20_RNAi	CG5346-990R21_RNAi	717	TAATACGACTCACTATAGGTATATCCGTGCCGATGGAGA	TAATACGACTCACTATAGGCGGTATTATCACGCGATGTTG					0.0520788	NS
	CG13531	CG13531-3630F40_RNAi	CG13531-4346R40_RNAi	716	TAATACGACTCACTATAGGTTGCTCGGAGAAATCGAGAAG	TAATACGACTCACTATAGGGACATTGTACCCGTCGGAGAA					0.0525708	NS
	Ice	Ice-292F41_RNAi	Ice-992R39_RNAi	700	TAATACGACTCACTATAGGATCTTCAACCATGAGCACTTCG	TAATACGACTCACTATAGGTTGTCGCTGAAACGCAGAAT					0.0531539	NS
	CG14194	CG14194-36F40_RNAi	CG14194-747R41_RNAi	711	TAATACGACTCACTATAGGCTGCAAGTTCATCGTCCACTG	TAATACGACTCACTATAGGCGGTGAGAAGACCACGATGTAC					0.0533928	NS
	CG10737	CG10737-111F41_RNAi	CG10737-835R41_RNAi	724	TAATACGACTCACTATAGGCTTCTCCGTGTGGCTAATCAAG	TAATACGACTCACTATAGGGGAACCTAGACACGGTGACCTT					0.0539136	NS
	CG15117	CG15117-44F41_RNAi	CG15117-753R41_RNAi	709	TAATACGACTCACTATAGGCCTGCACTTCTCCATAGCTCTG	TAATACGACTCACTATAGGACGCTATAGAACACTTCGCCAA					0.0541788	NS
	CG7224	CG7224-5F20_RNAi	CG7224-240R21_RNAi	235	TAATACGACTCACTATAGGAATCCGTGACCAGACAAACG	TAATACGACTCACTATAGGTCCTTCTCCTGGTACGGATGT					0.0548765	NS
	Bro	Bro-23F41_RNAi	Bro-524R41_RNAi	501	TAATACGACTCACTATAGGAGAGGTCCAAGTTCGATAGCGA	TAATACGACTCACTATAGGATTGGTCCTCTAGGCAGACCAG					0.0564711	NS
	CG13748	CG13748 1F rnai	CG13748 150R rnai	149	TAATACGACTCACTATAGGATGCGCGGACAACTGAAAG	TAATACGACTCACTATAGGGGTATTGGCCACATCGTC					0.056	NS
	Obp99d	Obp99d-12F41_RNAi	Obp99d-413R41_RNAi	401	TAATACGACTCACTATAGGGAGACTGGAGATCATCTGCTGG	TAATACGACTCACTATAGGCATCGTTCCACTTCCTTTTGAC					0.0565473	NS
	CG10365	CG10365-50F41_RNAi	CG10365-764R40_RNAi	714	TAATACGACTCACTATAGGTCAAGGATCTCTTCACCAATGG	TAATACGACTCACTATAGGCGTATCCTATCTGGATTGCGG					0.0569765	NS
	ctp	ctp-14F39_RNAi	ctp-551R39_RNAi	537	TAATACGACTCACTATAGGAGGCCGTGATTAAAAATGCC	TAATACGACTCACTATAGGTCATTTCCGCATCCTTGAGA					0.0572452	NS
	ATPCL	ATPCL-231F41_RNAi	ATPCL-937R41_RNAi	706	TAATACGACTCACTATAGGAGAACTTTGAGCAGGTGAAGCA	TAATACGACTCACTATAGGCCACTGTATTCGCCATAATTGG					0.0573151	NS
	CG1024	CG1024-375F41_RNAi	CG1024-1077R40_RNAi	702	TAATACGACTCACTATAGGTCTAGATCGGTGTTTGAATGCC	TAATACGACTCACTATAGGCTCCGGCTTAATAAGCAGCTG					0.0575206	NS
	Obp99b	Obp99b-71F40_RNAi	Obp99b-423R40_RNAi	352	TAATACGACTCACTATAGGACTATGTGGTGAAGACGCACG	TAATACGACTCACTATAGGCTGCAGGTTGGAGTTCATGAA					0.0575834	NS
	Slmb	slmb-232F40_RNAi	slmb-933R41_RNAi	701	TAATACGACTCACTATAGGCAATGCCTATCTCAAGCCGAT	TAATACGACTCACTATAGGCAGGTAACCATCATGCCATTGT					0.0581723	NS
	CG32412	CG32412-238F40_RNAi	CG32412-952R39_RNAi	714	TAATACGACTCACTATAGGCGGAAGTGGATGAGTTCAAGC	TAATACGACTCACTATAGGATGGAAGGCCAGTGCAGATT					0.0583717	NS
	CG10007	CG10007-46F40_RNAi	CG10007-766R41_RNAi	720	TAATACGACTCACTATAGGACCTTCAACGTTCTGGTGGTG	TAATACGACTCACTATAGGCACGCGAACTACAGCTAAATGG					0.0584829	NS
	CG13620	CG13620-201F41_RNAi	CG13620-904R40_RNAi	703	TAATACGACTCACTATAGGAGGACTTTGCCCAGGAGATATC	TAATACGACTCACTATAGGTAGCGGCTCCTTTCTAACCAG					0.0593238	NS
	CG18445	CG18445-195F40_RNAi	CG18445-895R40_RNAi	700	TAATACGACTCACTATAGGACACATTCGCCCTATCGATTG	TAATACGACTCACTATAGGAAAGCGTATGCAGGTGGTAGC					0.0597751	NS
	CG7706	CG7706-43F41_RNAi	CG7706-764R41_RNAi	721	TAATACGACTCACTATAGGGTGATTATCACAGAGAAGCCGC	TAATACGACTCACTATAGGTTGTGACTGAGATCCGTTTCCT					0.0599658	NS
	CG5429	CG5429-75F39_RNAi	CG5429-788R39_RNAi	713	TAATACGACTCACTATAGGGCTGGAGAAGATTAGCGTGCA	TAATACGACTCACTATAGGTAATGGTACCGAAATGCCCG					0.0610189	NS
	Sgs5	Sgs5-17F39_RNAI	Sgs5-447R40_RNAi	430	TAATACGACTCACTATAGGTGCTGCTTTTGTTATTGGCC	TAATACGACTCACTATAGGGCTGAGAATTTCAGCAGGTGG					0.0612324	NS
	CG4800	CG4800-42F41_RNAi	CG4800-496R40_RNAi	454	TAATACGACTCACTATAGGTGCCGACACCTACAAGATGAAG	TAATACGACTCACTATAGGCGTGCTTGAAGAACATGAGCA					0.0614375	NS
	TMS1	TMS1-220F41_RNAi	TMS1-923R39_RNAi	703	TAATACGACTCACTATAGGCAACTCCACCTCGTCGTATAGC	TAATACGACTCACTATAGGTGCCTGGATTGCATTCTTTC					0.0625053	NS
	CG31287	CG31287-16F41_RNAi	CG31287-634R20_RNAi	618	TAATACGACTCACTATAGGTTATCAGATCCGTCGACATTCC	TAATACGACTCACTATAGGTCCTTGACCTTTTTGCATGG					0.0650028	NS
	CG6891	CG6891-16F40_RNAi	CG6891-397R41_RNAi	381	TAATACGACTCACTATAGGTCGCTGGAGAAGGACTCGATT	TAATACGACTCACTATAGGGGTTCAGTGCTTCACGGAAGAG					0.0651186	NS
	Hsp67Bc	Hsp67Bc-19F_RNAi	Hsp67Bc-200R_RNAi	181	TAATACGACTCACTATAGGGTCTTGAATTTGGACTCCCCG	TAATACGACTCACTATAGGGCCAGCTCTCCGTTCCTTTTA	Hsp67Bc-236F_RNAi	Hsp67Bc-591R_RNAi	TAATACGACTCACTATAGGGCAATTTCGAGGTCCATCTGG	TAATACGACTCACTATAGGTTCTGGCTCTGAAGCAGAAGC	0.067	increased	0.00995446	increased
	CG8309	CG8309-52F40_RNAi	CG8309-754R40_RNAi	702	TAATACGACTCACTATAGGGCAAGAGCTGCGCAAGTATTT	TAATACGACTCACTATAGGTTCTCGGACACGAAGATGGAC					0.0671288	NS
	CG14899	CG14899-17F41_RNAi	CG14899-740R39_RNAi	723	TAATACGACTCACTATAGGAGTTCTACCTGGAGATCCCGGT	TAATACGACTCACTATAGGTCCATCAGCCGCAATCTCTT					0.0673971	NS
	CG5214	CG5214-13F40_RNAi	CG5214-728R41_RNAi	715	TAATACGACTCACTATAGGATTTCGATCGTAACGAGACGG	TAATACGACTCACTATAGGTCGGACCTAGTGCCTAGGATCT					0.068184	NS
	cathD	cathD-53F39_RNAi	cathD-776R39_RNAi	723	TAATACGACTCACTATAGGACCCAAATTCGCAGGAGAAG	TAATACGACTCACTATAGGGCATCCATCTTGATTTGCCA					0.0691792	NS
	msn	msn-23F40_RNAi	msn-723R41_RNAi	700	TAATACGACTCACTATAGGAACTGGCTCCATCGGTCAACT	TAATACGACTCACTATAGGCTGTGACTCAGCCATCTCCAGA					0.0709429	NS
	CG1967	CG1967-14F41_RNAi	CG1967-570R40_RNAi	556	TAATACGACTCACTATAGGTCGTTGTATTTGCGGTAGCTCT	TAATACGACTCACTATAGGAATCTGGACGAGACCGATCAC					0.0714673	NS
	CG13364	CG13364-10F39_RNAi	CG13364-245R40_RNAi	235	TAATACGACTCACTATAGGCGGAAATCGGAAAAACGTGT	TAATACGACTCACTATAGGTCTTTCCCGACTTCTTGATGC					0.0716831	NS
	CG11051	CG11051-8F20_RNAi	CG11051-256R22_RNAi	248	TAATACGACTCACTATAGGAGCTCGCAATTTGCATCCTC	TAATACGACTCACTATAGGGCTGGTGCCTGAAGAAATGTTT					0.0719922	NS
	CG6357	CG6357-9F41_RNAi	CG6357-709R41_RNAi	700	TAATACGACTCACTATAGGAGCTCGAATTTTACTTGGCGTC	TAATACGACTCACTATAGGGCTTCTTCCTTACGAATCTCGG					0.0758813	NS
	CG12262	CG12262-95F39_RNAi	CG12262-795R39_RNAi	700	TAATACGACTCACTATAGGAATGGCACCTCTTTCGCACT	TAATACGACTCACTATAGGCCTCGCCAATCAGCACATTT					0.0773403	NS
	CG14301	CG14301-34F41_RNAi	CG14301-536R39_RNAi	502	TAATACGACTCACTATAGGCCATGAAACAGTTCGTTCCAAG	TAATACGACTCACTATAGGATGATGCGATGTGGTCGAGT					0.0778968	NS
	CG17949	CG17949-7F40_RNAi	CG17949-312R39_RNAi	305	TAATACGACTCACTATAGGCCGAAAACTAGTGGAAAGGCA	TAATACGACTCACTATAGGCAACTCTCCAGGCAAAAGCA					0.0787669	NS
	CG8206	CG8206-15F40_RNAi	CG8206-517R40_RNAi	502	TAATACGACTCACTATAGGCAACATCTTCACATCGCGAAC	TAATACGACTCACTATAGGCCAGCACCTGGTCGATATTCT					0.0791393	NS
	PR2	PR2-490F39_RNAi	PR2-1196R41_RNAi	706	TAATACGACTCACTATAGGCTGCAATGGAATGCGCTATT	TAATACGACTCACTATAGGTGCTGATTCTGTGGTCACTCAC					0.0791837	NS
	CG13101	CG13101-78F39_RNAi	CG13101-778R40_RNAi	700	TAATACGACTCACTATAGGCCATGATACCCCCGATGATT	TAATACGACTCACTATAGGGAAGAAGGCAAAGAGCAGCAC					0.0800139	NS
	CG17665	CG17665-1745F41_RNAi	CG17665-2465R41_RNAi	720	TAATACGACTCACTATAGGTGCATAAGGCAAAGTCTCGAGT	TAATACGACTCACTATAGGCTCGCTAGAATTGTCATCGGAG					0.082218	NS
	CG15445	CG15445-236F39_RNAi	CG15445-939R40_RNAi	703	TAATACGACTCACTATAGGTTCAGCACCACAGGAATTGC	TAATACGACTCACTATAGGAGTCCTTGCCCTTCAAGGAGT					0.0828318	NS
	CG32604	CG32604-13F39_RNAi	CG32604-727R41_RNAi	714	TAATACGACTCACTATAGGAAGTTTGCCACCTTCTTCGG	TAATACGACTCACTATAGGTCCACAACTGGTACAGCGAGTT					0.0832409	NS
	CG6877 (Atg3)	CG6877-41F39_RNAi	CG6877-754R40_RNAi	713	TAATACGACTCACTATAGGATGTGGCCGAATATCTGACG	TAATACGACTCACTATAGGACATCTGTTCCACGGTCAGTG					0.0848291	NS
	Pdi	Pdi-91F40_RNAi	Pdi-802R39_RNAi	711	TAATACGACTCACTATAGGATTGCCAAGATGGACTCCACT	TAATACGACTCACTATAGGATCCGTCCCCCTTAAAAACC					0.0858669	NS
	Sec61alpha	Sec61alpha-194F41_RNAi	Sec61alpha-917R41_RNAi	723	TAATACGACTCACTATAGGCTACTGGATCCGTGTGATCCTG	TAATACGACTCACTATAGGGACGTACAAGTTGGACACGAGC					0.0862955	NS
	EP2237	EP2237-84F41_RNAi	EP2237-786R39_RNAi	702	TAATACGACTCACTATAGGTTCTGGCGCTGTCTCTTCTAGT	TAATACGACTCACTATAGGTTTGACGTGCTTCGACAGGT					0.0882381	NS
	decay	decay-135F41_RNAi	decay-839R41_RNAi	704	TAATACGACTCACTATAGGCGAGGACACATACGAGAATTGC	TAATACGACTCACTATAGGATTCGACTGGTACTCGTAGGCC					0.0886875	NS
	CG11399	CG11399-645F39_RNAi	CG11399-1356R39_RNAi	711	TAATACGACTCACTATAGGCATGCACATCCATCCCAATC	TAATACGACTCACTATAGGTATTCCGTGCTCCTTGAGCA					0.0887013	NS
	CG18812	CG18812-36F40_RNAi	CG18812-550R40_RNAi	514	TAATACGACTCACTATAGGAGTCGAGGATTTGACGGAGGT	TAATACGACTCACTATAGGCAGTCGGCACAGGATTGAAGT					0.0899493	NS
	CG4050	CG4050-615F40_RNAi	CG4050-1326R39_RNAi	711	TAATACGACTCACTATAGGTCTTAGCTACGCGAAGTCCGT	TAATACGACTCACTATAGGTCTGCCACCACAAATCCAAC					0.0910481	NS
	CG7809	CG7809-396F41_RNAi	CG7809-1076R41_RNAi	680	TAATACGACTCACTATAGGCCTACAGCGACTACGTGATTGG	TAATACGACTCACTATAGGCACCTAGAGCGTTAGCGTTTTG					0.0931548	NS
	CG9728	CG9728-92F40_RNAi	CG9728-795R39_RNAi	703	TAATACGACTCACTATAGGAGGATCTCTTGCATACGGAGC	TAATACGACTCACTATAGGTTGTCACCGAGATGCCAGTT					0.0961457	NS
	Spn1	Spn1-185F41_RNAi	Spn1-892R40_RNAi	707	TAATACGACTCACTATAGGCAGAGCGCCTTAGGTTTACCAT	TAATACGACTCACTATAGGTCGGTGAATAGCTCTCGGATG					0.0998964	NS
	Sh3beta	Sh3beta-72F40_RNAi	Sh3beta-451R39_RNAi	379	TAATACGACTCACTATAGGTTCTGATGATCCTGGACAGCA	TAATACGACTCACTATAGGCTTGACATCCACATCGCCAT					0.10178	NS
	CG3615	CG3615-278F40_RNAi	CG3615-981R39_RNAi	703	TAATACGACTCACTATAGGACCTTGACTCGTTCTTCTCGC	TAATACGACTCACTATAGGCAGCTCCGTTTGATTGCTTC					0.102349	NS
	Sgs7	Sgs7-7F21_RNAi	Sgs7-225R20_RNAi	218	TAATACGACTCACTATAGGCTGATCGCAGTCACCATCATC	TAATACGACTCACTATAGGTCATCCATTGTGGTTCTCCG					0.102691	NS
	CG9393	CG9393-279F39_RNAi	CG9393-985R41_RNAi	706	TAATACGACTCACTATAGGAAGCATTTGTCCACCGCCTA	TAATACGACTCACTATAGGCTCCATCTCGTCATCCTCGTAA					0.104919	NS
	CG8913	CG8913-146F40_RNAi	CG8913-846R40_RNAi	700	TAATACGACTCACTATAGGACGGCGTTGGACTCAGTAAAT	TAATACGACTCACTATAGGCGCACATAGTTAAGGCAGCTG					0.105233	NS
	CG8229	CG8229-41F39_RNAi	CG8229-746R41_RNAi	705	TAATACGACTCACTATAGGCAAACCAAGGACCACCACAA	TAATACGACTCACTATAGGGACATCCTCACACTTGCCTTCA					0.109319	NS
	CG1657	CG1657-251F40_RNAi	CG1657-902R41_RNAi	651	TAATACGACTCACTATAGGTACGATAGTGCCCAATTCGTG	TAATACGACTCACTATAGGGCTCAGTGTTTGGAGTAGCCAT					0.112963	NS
	Ark	Ark-94F21_RNAi	Ark-820R21_RNAi	726	TAATACGACTCACTATAGGGTCCAGGATATGCCGAAATCA	TAATACGACTCACTATAGGAGTGACCTGCTTGAACCGTGT					0.113207	NS
	CG16708	CG16708-71F41_RNAi	CG16708-785R41_RNAi	714	TAATACGACTCACTATAGGCTACGAGTGCCTCCAAGTTCAC	TAATACGACTCACTATAGGTCGTATACTCCCAGATCATGGC					0.11367	NS
	CG5508	CG5508-445F40_RNAi	CG5508-1145R41_RNAi	700	TAATACGACTCACTATAGGATCGAGATGCTCAAAACAGCC	TAATACGACTCACTATAGGAAGGAGGAGGTGGACTGATTGT					0.114505	NS
	CG13603	CG13603-19F41_RNAi	CG13603-679R39_RNAi	660	TAATACGACTCACTATAGGCTGCAGCTAAGCCAGATAGCTG	TAATACGACTCACTATAGGAGGATGCGTTCGAAACGATC					0.114983	NS
	CG8149	CG8149-86F41_RNAi	CG8149-800R40_RNAi	714	TAATACGACTCACTATAGGAATAAAACCGAACTGCAGGACC	TAATACGACTCACTATAGGTCCGTTTCTGGAGACGATCAT					0.115352	NS
	Fok	fok-26F39_RNAi	fok-291R40_RNAi	265	TAATACGACTCACTATAGGGCGACACCACAATGGCATAT	TAATACGACTCACTATAGGCAGATGCTGTCATGGTGCTTC					0.115889	NS
	CG10371	CG10371-29F41_RNAi	CG10371-538R39_RNAi	509	TAATACGACTCACTATAGGCCCTGCTGTACAATGTCCTGAT	TAATACGACTCACTATAGGTTGGTGTGCAGCAGAATGTG					0.116414	NS
	CG4798	CG4798-43F21_RNAi	CG4798-751R22_RNAi	708	TAATACGACTCACTATAGGATAACTTCGATCACCCGGATG	TAATACGACTCACTATAGGCTCGTAAAGGACACCTTGTGGA					0.116561	NS
	CG30104	CG30104-135F41_RNAi	CG30104-837R41_RNAi	702	TAATACGACTCACTATAGGCGATCAGACGAGCGTTAATAGC	TAATACGACTCACTATAGGCGTTGGATACGGTCCATCTATG					0.117327	NS
	CG7523	CG7523-91F41_RNAi	CG7523-792R39_RNAi	701	TAATACGACTCACTATAGGCTCTTCTCCAACGACAATGGAA	TAATACGACTCACTATAGGGGAATTTGTGGTGCCCTCA					0.117545	NS
	Spat	Spat-8F40_RNAi	Spat-713R41_RNAi	705	TAATACGACTCACTATAGGTACCACCGCCACTTGTACTCA	TAATACGACTCACTATAGGAGTAAACCTTCGGCTTGGTCTT					0.121641	NS
	Cng	Cng-200F40_RNAi	Cng-902R39_RNAi	702	TAATACGACTCACTATAGGACCACCAACACGGACAAGATT	TAATACGACTCACTATAGGCGCTGCAACGTATTGTTCCT					0.123294	NS
	CG5656	CG5656-173F41_RNAi	CG5656-873R41_RNAi	700	TAATACGACTCACTATAGGACTCCACCAAACCAATATCGTG	TAATACGACTCACTATAGGTGTTCAGGAGATCCGTACGACT					0.123874	NS
	CG4124	CG4124-537F40_RNAi	CG4124-1246R40_RNAi	709	TAATACGACTCACTATAGGAGTGGAAGCCTTTGTTGGACA	TAATACGACTCACTATAGGTGCCGAAGCTGTAGGAGATGT					0.124892	NS
	CG5373	CG5373-102F41_RNAi	CG5373-814R39_RNAi	712	TAATACGACTCACTATAGGAGCCGGACTATGAGAAACTGCT	TAATACGACTCACTATAGGCGCTCGACCAGATTTTCCAT					0.125283	NS
	CG7447	CG7447-208F39_RNAi	CG7447-915R39_RNAi	707	TAATACGACTCACTATAGGCTGAATCAAGCCAAATCGGA	TAATACGACTCACTATAGGTTGTGATCGATGACGTCCCT					0.125844	NS
	CG15281	CG15281-15F39_RNAi	CG15281-447R39_RNAi	432	TAATACGACTCACTATAGGTTGATCGCTGTGGTCTTTGC	TAATACGACTCACTATAGGGAAACGAAAAACTCCGCTGC					0.128015	NS
	Lsp1beta	Lsp1beta-521F39_RNAi	Lsp1beta-1222R40_RNAi	701	TAATACGACTCACTATAGGTTTGTGTTCGAAGCGGAGAA	TAATACGACTCACTATAGGGATGTTGTGAATGCGCTTCAG					0.128825	NS
	CG31715	CG31715-38F41_RNAi	CG31715-363R41_RNAi	325	TAATACGACTCACTATAGGTAAAGAACGGAGAGTTCGATGC	TAATACGACTCACTATAGGCTTAATCTCGTCTTTTTCCGCC					0.131643	NS
	Men	Men-270F39_RNAi	Men-976R39_RNAi	706	TAATACGACTCACTATAGGCATACGGATACGGAAACGCA	TAATACGACTCACTATAGGTTTCCGGCCAGTTCTTTAGC					0.132042	NS
	Dgp-1	Dgp-1-494F40_RNAi	Dgp-1-1194R40_RNAi	700	TAATACGACTCACTATAGGACGGTGAACTGGACAATGGTC	TAATACGACTCACTATAGGAAGGCATGTACCGGACACAAC					0.135958	NS
	CG10686	CG10686-666F41_RNAi	CG10686-1377R40_RNAi	711	TAATACGACTCACTATAGGATTAGCCTGATTGTGAGTCCCA	TAATACGACTCACTATAGGCTTCTCACCCACCTGCTCATT					0.136234	NS
	CG30344	CG30344-10F40_RNAi	CG30344-711R40_RNAi	701	TAATACGACTCACTATAGGTCTGATACGGAGGCTTTGGTG	TAATACGACTCACTATAGGACCATTATGCCAGCACAGAGG					0.138561	NS
	Septin1	Septin1-70F39_RNAi	Septin1-472R41_RNAi	402	TAATACGACTCACTATAGGCAACCAGGTGCATCGAAAGT	TAATACGACTCACTATAGGCCGAACGGCGATATAAAGTAGA					0.13898	NS
	CG32638	CG32638-449F40_RNAi	CG32638-1068R39_RNAi	619	TAATACGACTCACTATAGGTAACTGCATTTGAGTGCGAGC	TAATACGACTCACTATAGGTCTGATTACTTTCGGCAGCG					0.142807	NS
	Spn43Aa	Spn43Aa-98F40_RNAi	Spn43Aa-821R41_RNAi	723	TAATACGACTCACTATAGGACCGAACTCTTCCAAACCCTC	TAATACGACTCACTATAGGCTTCGAGCAGATTGAAGTCGAC					0.148415	NS
	hdc	hdc-40F40_RNAi	hdc-507R40_RNAi	467	TAATACGACTCACTATAGGCTGTTCATCCTCTCATCGCTG	TAATACGACTCACTATAGGCTTAACGAAGTGCGTGTCCTG					0.149632	NS
	CG7599	CG7599-66F39_RNAi	CG7599-393R39_RNAi	327	TAATACGACTCACTATAGGTGCGTCATCTTGTTCCTTGG	TAATACGACTCACTATAGGTTTTAGCTGCGCTCCCTTGT					0.151944	NS
	Vhal14	Vhal14-90F40_RNAi	Vhal14-368R40_RNAi	278	TAATACGACTCACTATAGGCGAGATCAACAAGAATCGCCA	TAATACGACTCACTATAGGACCAGATCCTCCGGATTGAAC					0.153121	NS
	Fax	fax-90F40_RNAi	fax-744R41_RNAi	654	TAATACGACTCACTATAGGTCATCAAGGAACTGTCGTCCA	TAATACGACTCACTATAGGCTGTTCGTTTGATTTCTCCTGC					0.154846	NS
	CG7059	CG7059-19F20_RNAi	CG7059-724R20_RNAi	705	TAATACGACTCACTATAGGTTGGTGATTTTGAGGCATGG	TAATACGACTCACTATAGGTCCTGATCCCCCAGATTGAT					0.155326	NS
	CG13321	CG13321-83F40_RNAi	CG13321-804R41_RNAi	721	TAATACGACTCACTATAGGGACCAGGATCCCATCTTTGTG	TAATACGACTCACTATAGGATGGTGTGACTGGTGGATCTTG					0.156915	NS
	CG1678	CG1678-1F41_RNAi	CG1678-206R40_RNAi	205	TAATACGACTCACTATAGGATGCGTGTAATCTTCCTCATCG	TAATACGACTCACTATAGGTCTTCGGAGGAGGATGAGTTG					0.157896	NS
	timp	timp-25F21_RNAi	timp-642R20_RNAi	617	TAATACGACTCACTATAGGTTATTGACGCTCCTCCTGGTC	TAATACGACTCACTATAGGCGGATTGCTCATGCACTTTC					0.15928	NS
	Sec61beta	Sec61beta-37F39_RNAi	Sec61beta-545R39_RNAi	508	TAATACGACTCACTATAGGACCACCAAAGTGACGTGGAA	TAATACGACTCACTATAGGACGTCGACATTGTTCACGCT					0.159372	NS
	CG5721	CG5721-2F39_RNAi	CG5721-702R39_RNAi	700	TAATACGACTCACTATAGGTGGCCAAGGTTATATCGCAG	TAATACGACTCACTATAGGCCAAACTCAACGCGAATGTC					0.159886	NS
	Idgf3	Idgf3-161F41_RNAi	Idgf3-866R41_RNAi	705	TAATACGACTCACTATAGGCTACAATTCTGCACCCATTTGG	TAATACGACTCACTATAGGTCTCTGAAGCAACCAGTGTTCC					0.160048	NS
	CG1104	CG1104-154F40_RNAi	CG1104-855R41_RNAi	701	TAATACGACTCACTATAGGCTGCTTGCCGAACGAATATCT	TAATACGACTCACTATAGGCGATGGAAGTATGGTGGTCAGA					0.161666	NS
	CG9779	CG9779-6F40_RNAi	CG9779-640R40_RNAi	634	TAATACGACTCACTATAGGCTTATTCGGCAGAACTCCCAG	TAATACGACTCACTATAGGTCTCTTGCAGTTCCTCACCCT					0.161718	NS
	Mpcp	Mpcp-295F239_RNAi	Mpcp-997R40_RNAi	702	TAATACGACTCACTATAGGAATCTGGTGCACGGATTCAA	TAATACGACTCACTATAGGTAGATGAACCACTGCAGAGCG					0.163533	NS
	CG1298	CG1298-81F40_RNAi	CG1298-783R41_RNAi	702	TAATACGACTCACTATAGGCACGCCTTATTGGCTGGTTAC	TAATACGACTCACTATAGGTTGAATTCCTCCTTGTACAGCG					0.163576	NS
	CG9338	CG9338-22F40_RNAi	CG9338-426R41_RNAi	404	TAATACGACTCACTATAGGATCTTGGCTCTCACCGTCTTG	TAATACGACTCACTATAGGAGAACAGGAGTATGACTCCGGC					0.164563	NS
	CG4420	CG4420-20F40_RNAi	CG4420-724R41_RNAi	704	TAATACGACTCACTATAGGCCAGCGATGACAAGGTCTTCT	TAATACGACTCACTATAGGCATTGTAACCGTGCCAAAGATC					0.164687	NS
	sba	sba-90F41_RNAi	sba-792R40_RNAi	702	TAATACGACTCACTATAGGTGGCAATATCAACAGGAAGACG	TAATACGACTCACTATAGGTCCGCCTAATGCTAATGCTTG					0.168398	NS
	CAH1	CAH1-125F41_RNAi	CAH1-776R40_RNAi	651	TAATACGACTCACTATAGGGGCAGCGAACTGAATGTAGCTC	TAATACGACTCACTATAGGCGGAGGACGGAAGTTGTTGAT					0.16842	NS
	Arp87C	Arp87C-26F40_RNAi	Arp87C-745R22_RNAi	719	TAATACGACTCACTATAGGACCAGCCCGTCGTCATAGATA	TAATACGACTCACTATAGGCAGCTTGTAGGCAAACTTCTCG					0.1685	NS
	raw	raw-8F39_RNAi	raw-725R39_RNAi	717	TAATACGACTCACTATAGGAAGTTCTGAATGCATGGCGA	TAATACGACTCACTATAGGTTTTGACCCGCTATGTGTGC					0.17182	NS
	CG17754	CG17754-11F21_RNAi	CG17754-728R21_RNAi	717	TAATACGACTCACTATAGGTGAACCAGAAGGAGAGTCCCA	TAATACGACTCACTATAGGATAAACGCTGGCTGCAGTAGG					0.173129	NS
	PGRP-LF	PGRP-LF-307F40_RNAi	PGRP-LF-1007R41_RNAi	700	TAATACGACTCACTATAGGGCATATACCGCATGAAGACCA	TAATACGACTCACTATAGGAAGGCCAC GACTAGTTCATCTG					0.173135	NS
	Def	Def-8F40_RNAi	Def-235R39_RNAi	227	TAATACGACTCACTATAGGTCTTCGTTCTCGTGGCTATCG	TAATACGACTCACTATAGGCTTTGAACCCCTTGGCAATG					0.173565	NS
	cin	cin-285F40_RNAi	cin-1010R40_RNAi	725	TAATACGACTCACTATAGGAATGCCCACAACTCTCCATGT	TAATACGACTCACTATAGGTTGGTGCTTAG ATCGTAGCCC					0.177797	NS
	CG8360	CG8360-19F40_RNAi	CG8360-427R40_RNAi	408	TAATACGACTCACTATAGGAATGGTGCCAGAGACGATCTC	TAATACGACTCACTATAGGAGCACCCTCAATGGAAGATTG					0.177803	NS
	ben	ben-36F39_RNAi	ben-452R40_RNAi	416	TAATACGACTCACTATAGGTCAACGTTTGATGCAGGAGC	TAATACGACTCACTATAGGTCTTCGACGGCATATTTCTGG					0.180725	NS
	Obp44a	Obp44a-7F41_RNAi	Obp44a-350R40_RNAi	343	TAATACGACTCACTATAGGAACGCTGTTGCTATTCTGCTGT	TAATACGACTCACTATAGGGCGACTTCTGCTCGTTCTTGT					0.181535	NS
	CG2016	CG2016-10F41_RNAi	CG2016-721R39_RNAi	711	TAATACGACTCACTATAGGAAGATGGTCTTCATTGTGCTCG	TAATACGACTCACTATAGGTCCATGAAGTTGCGGATGAC					0.183713	NS
	CG31935	CG31935-24F41_RNAi	CG31935-728R40_RNAi	704	TAATACGACTCACTATAGGTCGACGATAACGAGTTTTACCG	TAATACGACTCACTATAGGCGTAGGTGGTGCAAACTGAAA					0.184019	NS
	CG12081	CG12081-89F40_RNAi	CG12081-793R41_RNAi	704	TAATACGACTCACTATAGGGCTACTGCACCGGATACGATT	TAATACGACTCACTATAGGGCTGATCCAACAGGCCATTATA					0.184635	NS
	CG32742	CG32742-80F39_RNAi	CG32742-780R40_RNAi	700	TAATACGACTCACTATAGGCCAATGTGGTGTACGCCAAT	TAATACGACTCACTATAGGAGAGAAAGTTGCTCGGCTTCA					0.188284	NS
	CG14234	CG14234-15F41_RNAi	CG14234-720R40_RNAi	705	TAATACGACTCACTATAGGGGACATGGTGTATGACTACGGC	TAATACGACTCACTATAGGGATGCTGAGCACAATGGTGAC					0.188779	NS
	CG12942	CG12942-357F40_RNAi	CG12942-1069R40_RNAi	712	TAATACGACTCACTATAGGCAGCAACGAAACGATACCATG	TAATACGACTCACTATAGGAACTATTGCAAGGTCGGCACT					0.195544	NS
	fng	fng-46F41_RNAi	fng-753R39_RNAi	707	TAATACGACTCACTATAGGATCCTGCAAGCCATGATGTTAG	TAATACGACTCACTATAGGAGCCTCGGCACATTGACATA					0.19595	NS
	skl	skl-3F39_RNAi	skl-319R39_RNAi	316	TAATACGACTCACTATAGGGGCCATTCCATTTTTCGAAG	TAATACGACTCACTATAGGCCTGCGGTTGTATTTGAACG					0.19684	NS
	CG7588	CG7588-16F40_RNAi	CG7588-311R39_RNAi	295	TAATACGACTCACTATAGGCGGTATCTGTGCGTTTTTTCC	TAATACGACTCACTATAGGAACGAATCCGTCTCATGCCT					0.200292	NS
	CG7013	CG7013(ARP-like)-2F21_RNAi	CG7013(ARP-like)-504R21_RNAi	502	TAATACGACTCACTATAGGTGAAGACGTGGTACATGGTGG	TAATACGACTCACTATAGGCAGCTCCTCGATACGCTTGAT					0.204893	NS
	CG17574	CG17574-25F41_RNAi	CG17574-453R40_RNAi	428	TAATACGACTCACTATAGGTTCTTTCTGCTCACCTTCCTCA	TAATACGACTCACTATAGGTTGCTTCTCATATCCAGCGG					0.205706	NS
	Sply	Sply-371F41_RNAi	Sply-1080R40_RNAi	709	TAATACGACTCACTATAGGACTGGTCACTACAACTGGCGTG	TAATACGACTCACTATAGGTGTCCGAGTAAAGGATCACCG					0.205925	NS
	Ddc	Ddc-179F40_RNAi	Ddc-889R40_RNAi	710	TAATACGACTCACTATAGGGACATCGAGCGAGTCATCATG	TAATACGACTCACTATAGGAGAGTCTGCTGATTCGATGCC					0.208909	NS
	HmgZ	HmgZ-36F40_RNAi	HmgZ-312R41_RNAi	276	TAATACGACTCACTATAGGCTACATGCTGTGGCTCAACGA	TAATACGACTCACTATAGGTCGGAGGACTCTTTCTTCTTGG					0.210977	NS
	CG9911	CG9911-120F20_RNAi	CG9911-828R21_RNAi	708	TAATACGACTCACTATAGGTGGAAAAGTGGTGCTAGGCA	TAATACGACTCACTATAGGTACCCAGATGGTGCAGAGGAT					0.211183	NS
	maf-S	maf-S-8F39_RNAi	maf-S-346R41_RNAi	338	TAATACGACTCACTATAGGCAAAGCGCGAGAGAAAGTCA	TAATACGACTCACTATAGGCAGCGCCTTGTACTTGTTCTTC					0.211564	NS
	DnaJ60	DnaJ60-1F40_RNAi	DnaJ60-551R41_RNAi	550	TAATACGACTCACTATAGGATGCTAAGGTTGTGCCTTCCA	TAATACGACTCACTATAGGTTAGCCTCTGCTGAGATTTCGT					0.214537	NS
	CG9009	CG9009-310F41_RNAi	CG9009-1011R41_RNAi	701	TAATACGACTCACTATAGGGTACACTTTCGCTCAAATGCGT	TAATACGACTCACTATAGGGGTACTTGTCCA GCGACCTCAT					0.217274	NS
	CG5805	CG5805-74F40_RNAi	CG5805-790R41_RNAi	716	TAATACGACTCACTATAGGGAGCCACATACATACGCACCA	TAATACGACTCACTATAGGGTATTGTCGTTGTGAAGCCACC					0.217417	NS
	MICAL	MICAL-262F40_RNAi	MICAL-974R39_RNAi	712	TAATACGACTCACTATAGGAACGACTTCTACCCACGGCTA	TAATACGACTCACTATAGGATGTTTTCCAGGTCGATGCC					0.219178	NS
	Eip63F	Eip63F-93F41_RNAi	Eip63F-497R39_RNAi	404	TAATACGACTCACTATAGGAAGAAACCATTTACGGAGGTGG	TAATACGACTCACTATAGGAATCATCTCCATGGCGGTCT					0.223027	NS
	CG3829	CG3829-15F40_RNAi	CG3829-715R41_RNAi	700	TAATACGACTCACTATAGGAGATGCAGAGATGTCCATGCC	TAATACGACTCACTATAGGTGGATACAGCTAAGCGTTCGAA					0.223399	NS
	CG10228	CG40228-29F22_RNAi	CG40228-240R21_RNAi	211	TAATACGACTCACTATAGGCGCCTCCGAAGAGAAAGAATAT	TAATACGACTCACTATAGGTCACAGGCATCTACCCAATCA					0.223488	NS
	Mmp1	Mmp1-127F39_RNAi	Mmp1-837R39_RNAi	710	TAATACGACTCACTATAGGACCCTGTTTTCCATCATGGC	TAATACGACTCACTATAGGTTCAAAGCCGCGATAGAAGG					0.223941	NS
	TotA	TotA-29F39_RNAi	TotA-379R39_RNAi	350	TAATACGACTCACTATAGGTGCTTTGCACTGCTGCTGAT	TAATACGACTCACTATAGGTTGAGCAAGCTTTGAACCCA					0.224287	NS
	lox	lox-36F40_RNAi	lox-747R41_RNAi	711	TAATACGACTCACTATAGGAGTGGTTCTCAGCCAAGGTTG	TAATACGACTCACTATAGGCCGGTAGTTGAGGTCGTAAACA					0.228147	NS
	CG13670	CG13670-58F40_RNAi	CG13670-762R40_RNAi	704	TAATACGACTCACTATAGGCCAAAAGCACGGACTTCAACT	TAATACGACTCACTATAGGTCTGCCTCGACATATCCTTCC					0.229892	NS
	CG3223	CG3223-97F41_RNAi	CG3223-797R41_RNAi	700	TAATACGACTCACTATAGGGTGGTGACCAAAGAGATGCACT	TAATACGACTCACTATAGGGTTTCTCTGCGCAATATTCGAC					0.231493	NS
	Fdh	Fdh-66F41_RNAi	Fdh-727R41_RNAi	661	TAATACGACTCACTATAGGGCTGGTCATCGAGGATATCGAG	TAATACGACTCACTATAGGAGTCGGTGAATCCGAACTTCTT					0.236518	NS
	CG32762	CG32762-1F41_RNAi	CG32762-610R41_RNAi	609	TAATACGACTCACTATAGGATGCACAGCCAACAACTGACTT	TAATACGACTCACTATAGGTAGTAGTGCTGCGTCGAGTGGT					0.236917	NS
	CG12643	CG12643-60F41_RNAi	CG12643-199R39_RNAi	139	TAATACGACTCACTATAGGCATCAGTCCCGTGGACAGTAAG	TAATACGACTCACTATAGGCGGAGTTCTTGCACTGCAAAC					0.249841	NS
	CG1151	CG1151-172F41_RNAi	CG1151-849R40_RNAi	677	TAATACGACTCACTATAGGCGATAACCCTCAGATCGAGCTT	TAATACGACTCACTATAGGTTGTATCCCTGGTAGGCGATG					0.250602	NS
	CecB	CecB-17F40_RNAi	CecB-153R39_RNAi	136	TAATACGACTCACTATAGGTCTTCGTCTTTGTGGCACTCA	TAATACGACTCACTATAGGATTCCGAGGACCTGGATTGA					0.260285	NS
	CG9550	CG9550-25F39_RNAi	CG9550-728R41_RNAi	703	TAATACGACTCACTATAGGAAATTAACCGTCGCTTGCGT	TAATACGACTCACTATAGGGATAATCACTGACCATGTCGCC					0.263915	NS
	CG11880	CG11880-105F21_RNAi	CG11880-806R21_RNAi	701	TAATACGACTCACTATAGGCTGCCTGCTGTTATTCGTCCT	TAATACGACTCACTATAGGCGGTCTGCATCATCTTCTCCT					0.268749	NS
	CG14214	CG14214-7F22_RNAi	CG14214-200R22_RNAi	193	TAATACGACTCACTATAGGAAGGTTGTTAAGTTTGCCGAGC	TAATACGACTCACTATAGGCCCACGATGATATTGTTGATGG					0.269422	NS
	shg	shg-17F40_RNAi	shg-620R39_RNAi	603	TAATACGACTCACTATAGGAGCGAATGTCCAGAAGCTACC	TAATACGACTCACTATAGGTTTTCCGACATGGATTCGTC					0.27125	NS
	ex(CG4114)	ex(CG4114)-277F40_RNAi	ex(CG4114)-978R41_RNAi	701	TAATACGACTCACTATAGGGCAAGCTCTCAAAATATGGCC	TAATACGACTCACTATAGGCACAAACCAGGCACTACCAGAT					0.272063	NS
	CG6965	CG6965-163F40_RNAi	CG6965-865R40_RNAi	702	TAATACGACTCACTATAGGTCTTCCGATCCCAACCTAGTG	TAATACGACTCACTATAGGTGAAGCACAGGATAATGTCCG					0.27864	NS
	ftx-f1	ftx-f1-845F21_RNAi	ftx-f1-1548R21_RNAi	703	TAATACGACTCACTATAGGGTTATAGCCACGCCCATGAAC	TAATACGACTCACTATAGGCCCAACAAACCCAGACTCATC					0.281533	NS
	CG12012	CG12012-2F40_RNAi	CG12012-352R40_RNAi	350	TAATACGACTCACTATAGGTGGCAGATACCCGTAAAGACG	TAATACGACTCACTATAGGAGTTGGAACAGCGCTTCTCAC					0.284659	NS
	CG1751	CG1751-11F41_RNAi	CG1751-594R40_RNAi	583	TAATACGACTCACTATAGGAGGATGAAAAGTCACAGCAAGG	TAATACGACTCACTATAGGGAAAGGCTGCTAGCGTTCTT					0.285419	NS
	CG7350	CG7350-18F41_RNAi	CG7350-343R41_RNAi	325	TAATACGACTCACTATAGGGTTCCAGTCAACAGCCAAAAAG	TAATACGACTCACTATAGGCCAGCGAGTTCAGCAATATCAT					0.28573	NS
	CG6836	CG6836-78F40_RNAi	CG6836-784R39_RNAi	706	TAATACGACTCACTATAGGCACAAATAGCCTGCGAACACA	TAATACGACTCACTATAGGTGCAAAGCATCACCACCAGT					0.287198	NS
	m1	m1-2F41_RNAi	m1-456R40_RNAi	454	TAATACGACTCACTATAGGTGATGAGCCAAACTTTGACCCT	TAATACGACTCACTATAGGAAAAGACGGAAGAGCTCAGCG					0.287942	NS
	CG4115	CG4115-4F39_RNAi	CG4115-654R41_RNAi	650	TAATACGACTCACTATAGGAAAGCTTTCATTATCGCCGG	TAATACGACTCACTATAGGGGTTCGTGTAGCGCACATACTT					0.294168	NS
	CG18549	CG18549-46F41_RNAi	CG18549-747R39_RNAi	701	TAATACGACTCACTATAGGTTCCAGACCATGTGTAACATCG	TAATACGACTCACTATAGGGAATCCAATCGCTGATCCAA					0.294724	NS
	CG32040	CG32040-67F40_RNAi	CG32040-769R39_RNAi	702	TAATACGACTCACTATAGGGTGATGGACAACTTTGGCGAT	TAATACGACTCACTATAGGTAACGATTCCTGCATTCCCC					0.294777	NS
	CG10965	CG10965-5F40_RNAi	CG10965-583R40_RNAi	578	TAATACGACTCACTATAGGCCGATATCAGGAGCAGCTTGA	TAATACGACTCACTATAGGTCTTGGCTTCGAACAGACGTC					0.295324	NS
	CG7739	CG7739-125F39_RNAi	CG7739-831R39_RNAi	706	TAATACGACTCACTATAGGTCAATTCCGACGAACTCACG	TAATACGACTCACTATAGGTTCCGGCAATTGGATAGGAT					0.296602	NS
	knk	knk-391F39_RNAi	knk-1093R40_RNAi	722	TAATACGACTCACTATAGGCTGAGATTAAATGGCTGGCG	TAATACGACTCACTATAGGACGGCGCTAACGAAGTGATAT					0.300739	NS
	CG1241	CG1241-688F40_RNAi	CG1241-1393R41_RNAi	705	TAATACGACTCACTATAGGCCCATGATAGCCAAGCACAAT	TAATACGACTCACTATAGGCCGAGTAGCGAAGGTAACTTGC					0.30616	NS
	CG17494	CG17494-44F40_RNAi	CG17494-761R41_RNAi	717	TAATACGACTCACTATAGGGTCGGATCAACGGCATTAAAC	TAATACGACTCACTATAGGCTGGAGTGTACCACAAAATCGC					0.308263	NS
	Atet	Atet-263F41_RNAi	Atet-980R40_RNAi	717	TAATACGACTCACTATAGGATCTGAAGCAGAACAGTCACGG	TAATACGACTCACTATAGGCGATATCAGCTGGAAGCAGGT					0.309049	NS
	CG32091	CG32091-311F41_RNAi	CG32091-1012R40_RNAi	701	TAATACGACTCACTATAGGGCTGACTGTCGAGGAGCTTATG	TAATACGACTCACTATAGGTCACTTGCTCCAA CAGAGCAC					0.311218	NS
	CG8785	CG8785-477F22_RNAi	CG8785-1189R21_RNAi	712	TAATACGACTCACTATAGGGCAATTTGTGGATATCGGACTG	TAATACGACTCACTATAGGCACCGCTAAGCAGGATAATGC					0.313624	NS
	CG5390	CG5390-93F39_RNAi	CG5390-793R40_RNAi	700	TAATACGACTCACTATAGGTAAAACGGACGAAACACCCA	TAATACGACTCACTATAGGACGGTCTGAATGTTCTCCTGG					0.314894	NS
	CG10126	CG10126-28F40_RNAi	CG10126-608R40_RNAi	580	TAATACGACTCACTATAGGACAGATGGCGAGGACAAGGAT	TAATACGACTCACTATAGGCACGTCGCATCATCAGATCAA					0.315372	NS
	CG17765	CG17765-10F40_RNAi	CG17765-711R39_RNAi	701	TAATACGACTCACTATAGGTGAACGCCCTTCTTGTCATCT	TAATACGACTCACTATAGGTCAATACGAGCAGCCAATGG					0.316241	NS
	CG4851	CG4851-42F40_RNAi	CG4851-758R39_RNAi	716	TAATACGACTCACTATAGGCTCGTCCATTTCCGTCTCACT	TAATACGACTCACTATAGGTGGAGTCGCTGGTGAAAATC					0.317853	NS
	CG31232	CG31232-62F40_RNAi	CG31232-776R40_RNAi	714	TAATACGACTCACTATAGGCCATGAAGCCCATCGACTATC	TAATACGACTCACTATAGGCAGGAAGCCCTCGTTCTTGTA					0.332112	NS
	Akap200	Akap200-18F21_RNAi	Akap200-718R21_RNAi	700	TAATACGACTCACTATAGGCAAGCGTTCAATCGACATCAC	TAATACGACTCACTATAGGTCCTCAACTGTGGAAGGTGCT					0.334364	NS
	CG5484	CG5484-240F40_RNAi	CG5484-969R39_RNAi	729	TAATACGACTCACTATAGGTACGGATATGGAGCACCACCT	TAATACGACTCACTATAGGTTGTCCTGCAGCAGTTTCGT					0.334571	NS
	Tim17a2	Tim17a2-22F41_RNAi	Tim17a2-672R40_RNAi	650	TAATACGACTCACTATAGGTGTCCCATCAGGATTGTAGAGG	TAATACGACTCACTATAGGGACAATTTCGGCCAGCTTTAC					0.335602	NS
	CG5505	CG5505-135F39_RNAi	CG5505-835R40_RNAi	700	TAATACGACTCACTATAGGAACATACGCATTGGCTGGAA	TAATACGACTCACTATAGGTGGAGAATCGCTTCAGCTGTA					0.33749	NS
	CG31313	CG31313-23F40_RNAi	CG31313-377R41_RNAi	354	TAATACGACTCACTATAGGTTGTTCTGTCTGTGACCCTGG	TAATACGACTCACTATAGGGGTCTTCTCGAGCACATCTTCA					0.338585	NS
	CG32679	CG32679-74F40_RNAi	CG32679-588R40_RNAi	514	TAATACGACTCACTATAGGATTCTCCAGCTGCACAACGAA	TAATACGACTCACTATAGGTTCGTCCTGTAGTGCATTCCG					0.342552	NS
	CG7402	CG7402-324F40_RNAi	CG7402-1029R39_RNAi	705	TAATACGACTCACTATAGGCTTCCTCAGCGAGAACGTCTT	TAATACGACTCACTATAGGATCGCCTGGTTGGACACATA					0.347295	NS
	Ance4	Ance4-77F40_RNAi	Ance4-777R40_RNAi	700	TAATACGACTCACTATAGGGAGGCCAAGACGTTTGTGAAT	TAATACGACTCACTATAGGCCATTGAGATTGACCACATCG					0.350702	NS
	CG5714	CG5714-116F39_RNAi	CG5714-816R39_RNAi	700	TAATACGACTCACTATAGGTGATGCTTCAGATCCGCAAC	TAATACGACTCACTATAGGATATCGCATGGTGCGAAGTG					0.353956	NS
	E74	E74-19F39_RNAi	E74-732R41_RNAi	713	TAATACGACTCACTATAGGTCAAGCAATCGACAAGTCCG	TAATACGACTCACTATAGGTAGGACGTTGTCAGGTAGCCAG					0.35959	NS
	Talin	Talin-4081F22_RNAi	Talin-4782R21_RNAi	701	TAATACGACTCACTATAGGCGAGGTGTGACCGAAAGTATCA	TAATACGACTCACTATAGGAGCATACTGACGCACAGCCTT					0.359926	NS
	CG7529	CG7529-18F40_RNAi	CG7529-718R41_RNAi	700	TAATACGACTCACTATAGGATACGTGATGCTGACGCTGTG	TAATACGACTCACTATAGGAGCAGCAAGGAACTGGCTACTC					0.361675	NS
	CG17333	CG17333-18F40_RNAi	CG17333-694R40_RNAi	676	TAATACGACTCACTATAGGTGCGCTAAAAGTAATCCCGTC	TAATACGACTCACTATAGGAATGTCAACTGCCCTTTGGTC					0.363117	NS
	not	not-49F40_RNAi	not-750R40_RNAi	701	TAATACGACTCACTATAGGTACGATTTCGCAACTGGTCAC	TAATACGACTCACTATAGGGCTTTGATAGTGCCGACAACC					0.374224	NS
	CG1401	CG1401-205F40_RNAi	CG1401-912R39_RNAi	707	TAATACGACTCACTATAGGCGTTGAGTTTATCGTCCAGGC	TAATACGACTCACTATAGGTTCTCTTGCTGTTGTTCGGC					0.375285	NS
	Reg5	Reg5-49F41_RNAi	Reg5-784R39_RNAi	735	TAATACGACTCACTATAGGTTCCACATTCAGATCAGCTCGT	TAATACGACTCACTATAGGAAGGAGCTGATTGTGGCGAT					0.375781	NS
	hep_AB	hep_AB-140F39_RNAi	hep_AB-840R40_RNAi	700	TAATACGACTCACTATAGGCAACACCGCCAAATATTGCA	TAATACGACTCACTATAGGCCGTTTCCTCCATAATCCGAC					0.377199	NS
	CG7986	CG7986-375F40_RNAi	CG7986-1099R40_RNAi	724	TAATACGACTCACTATAGGAGGACATGAAGGTGGTGCACA	TAATACGACTCACTATAGGCGTGCCTCTTTATTAGCTGGC					0.378933	NS
	CG18811	CG18811-411F39_RNAi	CG18811-1113R41_RNAi	702	TAATACGACTCACTATAGGTACAGAGCAGCGGAAAGGAA	TAATACGACTCACTATAGGGCCCAAATGCAACTTGTCTAGT					0.383262	NS
	CG10006	CG10006-186F40_RNAi	CG10006-899R40_RNAi	713	TAATACGACTCACTATAGGCTCAAATTCACAGTCGGAGGC	TAATACGACTCACTATAGGTAGCAGCGGAATCAGGTTCTC					0.395538	NS
	CG5455	CG5455-163F39_RNAi	CG5455-865R41_RNAi	702	TAATACGACTCACTATAGGCCACTGCAGGAAATCGATGA	TAATACGACTCACTATAGGTGTAGACCATGGATGAGCACAA					0.397676	NS
	CG14995	CG14995-24F39_RNAi	CG14995-394R41_RNAi	370	TAATACGACTCACTATAGGTGTGTCCATCATCAAGCGAA	TAATACGACTCACTATAGGTGGTATGCATCCTCGTAGACCT					0.398788	NS
	CG1021	CG1021-210F20_RNAi	CG1021-912R22_RNAi	702	TAATACGACTCACTATAGGACACGAACAGCAATTCCTCG	TAATACGACTCACTATAGGGAACTGGTGATTCTGCAAGTCC					0.399455	NS
	Stai	stai-133F40_RNAi	stai-508R41_RNAi	375	TAATACGACTCACTATAGGTTGAGCAGAAACTTAAGGCGG	TAATACGACTCACTATAGGCTCCTTTAGGCGATCCAACATT					0.399489	NS
	cm	cm-86F41_RNAi	cm-800R40_RNAi	714	TAATACGACTCACTATAGGGTGTGCGAATACTTCCTTGACG	TAATACGACTCACTATAGGTGTGATATGACATCAGGCGGA					0.399544	NS
	CG3036	CG3036-226F40_RNAi	CG3036-926R41_RNAi	700	TAATACGACTCACTATAGGTGGAGTGGATGTGTACGAGGA	TAATACGACTCACTATAGGATCGAAGTGCAGAATCTTGGAC					0.403315	NS
	CG5977	CG5977-351F41_RNAi	CG5977-1055R39_RNAi	704	TAATACGACTCACTATAGGCGTCTCGTTCCCCATAATCTTT	TAATACGACTCACTATAGGTGGTTCGTTGGTCATTCCTG					0.403645	NS
	Tollo	Tollo-70F41_RNAi	Tollo-786R40_RNAi	716	TAATACGACTCACTATAGGCTCAGCAAGACGGTGTTGTACC	TAATACGACTCACTATAGGAACCCTCAGCGAAAGAAGACC					0.404083	NS
	Hsp26	Hsp26-4F41_RNAi	Hsp26-584R39_RNAi	580	TAATACGACTCACTATAGGTCGCTATCTACTCTGCTTTCGC	TAATACGACTCACTATAGGACCTCGCTTTCATTTGCCTT					0.404202	NS
	CG5987	CG5987-242F41_RNAi	CG5987-950R40_RNAi	708	TAATACGACTCACTATAGGCCGACAAGCAAGTGGATGATAA	TAATACGACTCACTATAGGTCCACGGAGGTAATCAAGGTG					0.405091	NS
	CG10861	CG10861-80F41_RNAi	CG10861-345R41_RNAi	265	TAATACGACTCACTATAGGTTTGTATCCTTCTGAACGCCAC	TAATACGACTCACTATAGGTCATGTGCGTATCGATTTAGCC					0.407444	NS
	CG4346	CG4346-304F41_RNAi	CG4346-1005R40_RNAi	701	TAATACGACTCACTATAGGATTTCCTTCGTTCCAGTCCTTC	TAATACGACTCACTATAGGAGGTGT TGGTCATCTTCAGGC					0.408508	NS
	fs(1)Yb	fs(1)Yb-325F41_RNAi	fs(1)Yb-1030R41_RNAi	705	TAATACGACTCACTATAGGCGAGCATCTTGGAGTAGTCGAG	TAATACGACTCACTATAGGCACTGCTAGAGAGGCAGGTGAA					0.413986	NS
	CG31732	CG31732-58F40_RNAi	CG31732-759R40_RNAi	701	TAATACGACTCACTATAGGAGTCAAATGTGTCGGCAAGTG	TAATACGACTCACTATAGGTGTGTACAACCTCGTCCAAGG					0.415475	NS
	CG4428 (Atg4a)	CG4428-125F39_RNAi	CG4428-839R41_RNAi	714	TAATACGACTCACTATAGGACATTCCCCGAAGAAACACC	TAATACGACTCACTATAGGTGCGTGGTATGAGGATCTAGGT					0.417484	NS
	Rab7	Rab7-267F39_RNAi	Rab7-969R40_RNAi	702	TAATACGACTCACTATAGGCGGAGGTTTATCGCATCATG	TAATACGACTCACTATAGGTTCGGTTGCTACTCCTGTTCC					0.419306	NS
	larp	larp-7F40_RNAi	larp-708R40_RNAi	701	TAATACGACTCACTATAGGACCCACTACTTTGGCAACGTG	TAATACGACTCACTATAGGGCATTTCTCTTGTCTGGCGTC					0.441236	NS
	CG10988	CG10988-28F39_RNAi	CG10988-728R39_RNAi	700	TAATACGACTCACTATAGGGATGTGGCAACCAATTCCAC	TAATACGACTCACTATAGGCGGTGAAGGAGTAAATGGCA					0.445296	NS
	CG3942	CG3942-232F39_RNAi	CG3942-932R40_RNAi	700	TAATACGACTCACTATAGGTTGGCCAAGAATGACTGCAT	TAATACGACTCACTATAGGTCTGGCATCAGGAATCCGTAC					0.448403	NS
	CG7594	CG7594-43F40_RNAi	CG7594-387R41_RNAi	344	TAATACGACTCACTATAGGTGACTGTCTGCTTCCTGGTGA	TAATACGACTCACTATAGGCCAGTCCCGAAAGTGAATATCA					0.448471	NS
	UbcD10	UbcD10-19F39_RNAi	UbcD10-446R40_RNAi	427	TAATACGACTCACTATAGGCTGCGAAAAGAATTGAGCGA	TAATACGACTCACTATAGGTCGCTGTGCTTCTTGGTGTAG					0.452596	NS
	Pglym78	Pglym78-7F41_RNAi	Pglym78-685R41_RNAi	678	TAATACGACTCACTATAGGGGCAAGTACAAGATCGTGATGG	TAATACGACTCACTATAGGTGAAGTTCTCGTCCAGCTCGTA					0.452811	NS
	Pdk	pdk-179F40_RNAi	pdk-879R40_RNAi	700	TAATACGACTCACTATAGGCCTGTTCGACTGGCGAATATC	TAATACGACTCACTATAGGACAGATGTCCTCCTTGCCCTT					0.456098	NS
	CG12448	CG12448-22F40_RNAi	CG12448-727R39_RNAi	705	TAATACGACTCACTATAGGAGCCATCAGAACACGGACAAT	TAATACGACTCACTATAGGCAAACGTGGTGTCATTCGCT					0.457125	NS
	usnp	usnp-9F41_RNAi	usnp-713R40_RNAi	704	TAATACGACTCACTATAGGTAACTACCTGCAGCCAGTGCAC	TAATACGACTCACTATAGGACAGGTTGCTGCACATCTCCT					0.458082	NS
	CG3564	CG3564-208F40_RNAi	CG3564-608R41_RNAi	400	TAATACGACTCACTATAGGGGATAACCATGTGATGCACGA	TAATACGACTCACTATAGGGCGTTTCAGGTAGTACACCTGG					0.46323	NS
	CG7144	CG7144-168F39_RNAi	CG7144-871R41_RNAi	703	TAATACGACTCACTATAGGTCATAGTGCAGCCGTCCAAT	TAATACGACTCACTATAGGGAACTCATCGTATTCCTTGGCA					0.464407	NS
	Dcp-1	Dcp-1-13F41_RNAi	Dcp-1-718R41_RNAi	705	TAATACGACTCACTATAGGTGCGTAACCAGAAACTACGGAG	TAATACGACTCACTATAGGGGAATGGTCGAGTAGGAGAAG					0.465379	NS
	CG2233	CG2233-5F39_RNAi	CG2233-705R39_RNAi	700	TAATACGACTCACTATAGGTTTCGATTAACGCCGTGATC	TAATACGACTCACTATAGGGACCAAACTGCCAACCTGAA					0.470193	NS
	CG1129	CG1129-40F41_RNAi	CG1129-745R41_RNAi	705	TAATACGACTCACTATAGGTTGATTCTGGTCGGTGGTTATG	TAATACGACTCACTATAGGCGCAGCGAGCTTAGATACAGAC					0.474598	NS
	CG31988	CG31988-38F40_RNAi	CG31988-497R40_RNAi	459	TAATACGACTCACTATAGGCCATCACCAAGCGTATGATCA	TAATACGACTCACTATAGGATGGTGAAAGTCTGCGAGGTT					0.47544	NS
	CG5973	CG5973-68F39_RNAi	CG5973-784R41_RNAi	716	TAATACGACTCACTATAGGAGATCCGCATGGAGAAGGAA	TAATACGACTCACTATAGGTTGTAGTCCTTGCCATGGAAGA					0.476135	NS
	CG7608	CG7608-30F40_RNAi	CG7608-341R41_RNAi	311	TAATACGACTCACTATAGGCTATTCTCTGCCTTTGCGTGG	TAATACGACTCACTATAGGGGTTGTCCTCCTTGAAGTTGGA					0.482622	NS
	CG14812	CG14812-11F41_RNAi	CG14812-278R40_RNAi	267	TAATACGACTCACTATAGGAACTGGAGAAAGTCCTAGCGGA	TAATACGACTCACTATAGGTGCTTGAAGATAACGCCTGTG					0.484761	NS
	Lsp2	Lsp2-592F41_RNAi	Lsp2-1292R41_RNAi	700	TAATACGACTCACTATAGGAACGTGGTGATCCGTACGAACT	TAATACGACTCACTATAGGTGGTACTCCGGATAGGTCTCCA					0.48592	NS
	CG6770	CG6770-27F41_RNAi	CG6770-172R40_RNAi	145	TAATACGACTCACTATAGGCGAGCACTACAACTTCGACCAT	TAATACGACTCACTATAGGTGGTGTTCATCAGCTTGGTCA					0.493206	NS
	CG5270	CG5270-23F40_RNAi	CG5270-723R40_RNAi	700	TAATACGACTCACTATAGGCGTTTTGGAAGCTAATCCGTC	TAATACGACTCACTATAGGAGTGCCATCACCTTGATCCTT					0.493569	NS
	CG7630	CG7630-44F40_RNAi	CG7630-151R40_RNAi	107	TAATACGACTCACTATAGGCCACTCCACCATGAACGATCT	TAATACGACTCACTATAGGAGGACGAGAATGCCAGTGATG					0.499464	NS
	CG18067	CG18067-23F40_RNAi	CG18067-723R41_RNAi	700	TAATACGACTCACTATAGGTCGAACACTGGAGCTTGGATT	TAATACGACTCACTATAGGCCCTTTGAATATCAGCCATGGT					0.503562	NS
	CG3394	CG3394-243F40_RNAi	CG3394-945R40_RNAi	702	TAATACGACTCACTATAGGCGTCTGGAGTATCCCTGCATT	TAATACGACTCACTATAGGCATTTCCGTACATCAGACGCA					0.503574	NS
	CG3132	CG3132-63F40_RNAi	CG3132-767R40_RNAi	704	TAATACGACTCACTATAGGTCGCACTTTTGTGGTGGACTA	TAATACGACTCACTATAGGACCCTTTGGCTGGTACCTTCT					0.509646	NS
	CG2803	CG2803-73F40_RNAi	CG2803-456R41_RNAi	383	TAATACGACTCACTATAGGACAGCCCAGCAACTCAATCCT	TAATACGACTCACTATAGGGATGGCGCATAATGTATGGATG					0.511831	NS
	pAbp	pAbp-9F41_RNAi	pAbp-709R40_RNAi	700	TAATACGACTCACTATAGGTCTATACGTCGGTGATCTCCCA	TAATACGACTCACTATAGGAGCCTCTGTTGTCTCGAATGC					0.523088	NS
	CG32006	CG32006-434F39_RNAi	CG32006-688R39_RNAi	254	TAATACGACTCACTATAGGACCGAGAAACCGCCTTTTAA	TAATACGACTCACTATAGGTTCCGGTCACACTTTTTTGG					0.52653	NS
	CG11299	CG11299-140F39_RNAi	CG11299-863R40_RNAi	723	TAATACGACTCACTATAGGTATCATCCCCAGTTCCACGA	TAATACGACTCACTATAGGCCATTAGCGTCTCCACACTGA					0.533568	NS
	alphaTub84B	alphaTub84B-22F40_RNAi	alphaTub84B-735R40_RNAi	713	TAATACGACTCACTATAGGTATCCATGTTGGTCAGGCTGG	TAATACGACTCACTATAGGAATCGCAGAGAGGCGGTAATC					0.53639	NS
	Carmer	Carmer-89F39_RNAi	Carmer-791R41_RNAi	702	TAATACGACTCACTATAGGTAATCAGCTCGATTGCCGAC	TAATACGACTCACTATAGGTGCGCTCGTTGTACAGCATATA					0.538625	NS
	His3.3B	His3.3B-2F41_RNAi	His3.3B-372R39_RNAi	370	TAATACGACTCACTATAGGTGGCTCGTACTAAGCAGACTGC	TAATACGACTCACTATAGGTTAGGCATGATTGTCACGCG					0.54066	NS
	Klp31E	Klp31E-353F40_RNAi	Klp31E-1057R41_RNAi	704	TAATACGACTCACTATAGGCGTTCAGCTTGGCATTATTCC	TAATACGACTCACTATAGGCCATGAAGTCTCGATCACTTGG					0.541331	NS
	CG2444	CG2444-30F40_RNAi	CG2444-436R41_RNAi	406	TAATACGACTCACTATAGGGATCCCAGAGTTTCCACCAGA	TAATACGACTCACTATAGGGATGTTAGATGTGCTTGTCGCA					0.547404	NS
	CG10908	CG10908-86F40_RNAi	CG10908-587R39_RNAi	501	TAATACGACTCACTATAGGGCTTCGATGTGATACCCCTTC	TAATACGACTCACTATAGGGCCCAAATCCTGCGAGTATT					0.556115	NS
	Tsp42Ed	Tsp42Ed-68F39_RNAi	Tsp42Ed-699R41_RNAi	631	TAATACGACTCACTATAGGTGCGGCATTTTGCTTATCAC	TAATACGACTCACTATAGGTAGTAGTTCTGGCGTCTCTGCG					0.560497	NS
	CG2177	CG2177-137F41_RNAi	CG2177-820R39_RNAi	683	TAATACGACTCACTATAGGGGCATTCGATCATTGTATGTGG	TAATACGACTCACTATAGGGCGCCGCAAATCAGAATTAC					0.577486	NS
	CG5445	CG5445-2F41_RNAi	CG5445-702R39_RNAi	700	TAATACGACTCACTATAGGTGGATGTGGAGGAGAACTACGA	TAATACGACTCACTATAGGATATCACAAGTTTCGCCCGG					0.580873	NS
	Sktl	sktl-61F39_RNAi	sktl-770R40_RNAi	709	TAATACGACTCACTATAGGCAGCCGGATGATGAGAATGA	TAATACGACTCACTATAGGAATATGGAACCAGAGGCACCC					0.596645	NS
	CG31814	CG31814-90F41_RNAi	CG31814-812R39_RNAi	722	TAATACGACTCACTATAGGCATCACGATAATAGCCACTGCC	TAATACGACTCACTATAGGACCCGTTTGCTAATCGAAGG					0.600679	NS
	lilli	lilli-619F39-RNAi	lilli-1328R40-RNAi	709	TAATACGACTCACTATAGGTGAAGAACGACATTCCGTCG	TAATACGACTCACTATAGGACGAGTCTTGCTTCTCCAACG					0.604	NS
	CG4783	CG4783-26F40_RNAi	CG4783-245R40_RNAi	219	TAATACGACTCACTATAGGCAATTATCCTCCTGCTGCCAG	TAATACGACTCACTATAGGCAGTTGCGCAGTAGAACCACA					0.631867	NS
	CG8180	CG8180-276F39_RNAi	CG8180-995R40_RNAi	719	TAATACGACTCACTATAGGTCATCATCGAACTGAAGCCG	TAATACGACTCACTATAGGTCGAATAGATCCGACTCCAGG					0.637462	NS
	CG2358	CG2358-19F40_RNAi	CG2358-541R41_RNAi	522	TAATACGACTCACTATAGGTTGCAGATTGACGAGATGCTG	TAATACGACTCACTATAGGCCAAAATAGAGAGAATGGCCCA					0.645971	NS
	CG11785	CG11785-24F40_RNAi	CG11785-739R41_RNAi	715	TAATACGACTCACTATAGGAGCCACCTCATCTTTGTCAGC	TAATACGACTCACTATAGGGCACGCATTAAGACTACGGCTA					0.651018	NS
	CG14933	CG14933-10F40_RNAi	CG14933-230R39_RNAi	220	TAATACGACTCACTATAGGCTGACTTTGCTGCTCGTTTTG	TAATACGACTCACTATAGGTTTGTCTCGTTGCAAGGTCC					0.652254	NS
	CG2852	CG2852-12F39_RNAi	CG2852-507R41_RNAi	495	TAATACGACTCACTATAGGAAGTTCCACCGCATCATCAA	TAATACGACTCACTATAGGACATGGCGAGCTATGGTAAATG					0.654315	NS
	gammaCop	gammaCop-97F40_RNAi	gammaCop-814R39_RNAi	717	TAATACGACTCACTATAGGTCCACATCCTGACCAAAATCC	TAATACGACTCACTATAGGTCTTGAGGTTGACAATGGCG					0.656313	NS
	CG10516	CG10516-71F40_RNAi	CG10516-751R41_RNAi	680	TAATACGACTCACTATAGGGGCACGGAAAGCGTTAATCTA	TAATACGACTCACTATAGGAAGTACTCGTCGCACATCTCGT					0.656985	NS
	CG1908	CG1908-353F40_RNAi	CG1908-1059R40_RNAi	706	TAATACGACTCACTATAGGAGGTAGTGCCTTTGATCGTCG	TAATACGACTCACTATAGGCTTCGCGGTATTATTCTTCGC					0.659227	NS
	Gs1	Gs1-68F40_RNAi	Gs1-771R40_RNAi	703	TAATACGACTCACTATAGGGTCTGCTGCGTACTGGCAATA	TAATACGACTCACTATAGGCGACACCCATAAATCGTCACA					0.672703	NS
	CG8860	CG8860-55F39_RNAi	CG8860-310R41_RNAi	255	TAATACGACTCACTATAGGGTTGTCAAATTCGCCGAACC	TAATACGACTCACTATAGGGCGTGGAATCGTGAACTACATG					0.673078	NS
	bic	bic-67F41_RNAi	bic-487R40_RNAi	420	TAATACGACTCACTATAGGCGCAAGAAGAAGATCGTCCAC	TAATACGACTCACTATAGGCGGACTTCTCCTCCTTTGTGTC					0.684712	NS
	SsRbeta	SsRbeta-109F41_RNAi	SsRbeta-570R40_RNAi	461	TAATACGACTCACTATAGGAAGTACCTGGTGGAGAAGAGCG	TAATACGACTCACTATAGGTTCTTGTTCTTTCCAGAGCGC					0.697959	NS
	CG15825	CG15825-260F41_RNAi	CG15825-963R41_RNAi	703	TAATACGACTCACTATAGGGTTCCTTCGGCTCTAACTTTGC	TAATACGACTCACTATAGGGCCATAAGAACTGCCAAACTGA					0.704716	NS
	ng4	ng4-12F41_RNAi	ng4-158R40_RNAi	146	TAATACGACTCACTATAGGACTGCTGCTAATAGTCCTGCCC	TAATACGACTCACTATAGGTCATGCTTCTGAAAGTCGGTG					0.707007	NS
	stck	stck-73F40_RNAi	stck-773R39_RNAi	700	TAATACGACTCACTATAGGAATGGAGAACTCTGGCACACC	TAATACGACTCACTATAGGTGATGATAGTGCGTCTCGCA					0.707405	NS
	Sema-5c	Sema-5c-168F20_RNAi	Sema-5c-868R21_RNAi	700	TAATACGACTCACTATAGGTTTACGATCCCGAAACGACC	TAATACGACTCACTATAGGCGAGCCTTCAGAAACGATGTC					0.707902	NS
	CG7603	CG7603-43F41_RNAi	CG7603-308R40_RNAi	265	TAATACGACTCACTATAGGCGCAACCGTCTACTACACACAA	TAATACGACTCACTATAGGTGTCCTTGACCTTCTTGAGGC					0.716024	NS
	Eip71CD	Eip71CD-20F41_RNAi	Eip71CD-203R40_RNAi	183	TAATACGACTCACTATAGGCCAGTGTCACTCATCCTGAGCT	TAATACGACTCACTATAGGCGGTGGTTCTCAAAACTCCAC					0.726582	NS
	DnaJ-1	DnaJ-1-78F41_RNAi	DnaJ-1-778R40_RNAi	700	TAATACGACTCACTATAGGACTGGCACTCAAATACCATCCC	TAATACGACTCACTATAGGACAAGGCCTGCTTCAGACTGA					0.726874	NS
	CG8877	CG8877-274F39_RNAi	CG8877-986R39_RNAi	712	TAATACGACTCACTATAGGGAGAAGGCGCTTAAATGGCA	TAATACGACTCACTATAGGTTAAGAGCCTTGGCGGTGAA					0.727651	NS
	CG8788	CG8788-2F41_RNAi	CG8788-670R41_RNAi	668	TAATACGACTCACTATAGGTGGATAGCGTCAAGTCGTTCTT	TAATACGACTCACTATAGGTAGTCAAGTAGGATGGAGGCGC					0.74477	NS
	CG31955	CG31955-79F39_RNAi	CG31955-456R41_RNAi	377	TAATACGACTCACTATAGGCACATGCCGGATTCCAAATT	TAATACGACTCACTATAGGCTTTTCACAACTTTGGTGGACG					0.749736	NS
	Thor	Thor-48F41_RNAi	Thor-340R41_RNAi	292	TAATACGACTCACTATAGGCATGATCACCAGGAAGGTTGTC	TAATACGACTCACTATAGGGGAACTGTTCCTGGTCCTCAAT					0.753143	NS
	CG31048	CG31048-588F40_RNAi	CG31048-1311R40_RNAi	723	TAATACGACTCACTATAGGTGGCATCGTGAAGCTCTACAA	TAATACGACTCACTATAGGTGGTTATCGTAGAGCCCTGGA					0.756484	NS
	CG8157	CG8157-52F40_RNAi	CG8157-325R40_RNAi	273	TAATACGACTCACTATAGGCAGACCTCAATTTGGACCTGG	TAATACGACTCACTATAGGTCCATGGTGTCTGTGGTGTTC					0.756845	NS
	nkd	nkd-31F40_RNAi	nkd-733R39_RNAi	702	TAATACGACTCACTATAGGCATAAAATTCTCGGCGGCTAC	TAATACGACTCACTATAGGCGCACGTTGATTGTCTTGCT					0.760826	NS
	Crq	crq-157F39_RNAi	crq-876R41_RNAi	719	TAATACGACTCACTATAGGTGATGCCTATGAAAGCTGGC	TAATACGACTCACTATAGGCGGAGGTTCATAAATCTGCAAG					0.763651	NS
	CG17836	CG17836-176F40_RNAi	CG17836-878R41_RNAi	702	TAATACGACTCACTATAGGCAACGACAACCTAGACGACGA	TAATACGACTCACTATAGGGCTGAGTAGTTGCTGTGTGGTG					0.76688	NS
	CG3308	CG3308-96F40_RNAi	CG3308-798R40_RNAi	702	TAATACGACTCACTATAGGTGAGAACCTGATCGTCATCGA	TAATACGACTCACTATAGGTACCAGTCTTCACGTGTTGCG					0.779633	NS
	Fbp2	Fbp2-10F41_RNAi	Fbp2-728R39_RNAi	718	TAATACGACTCACTATAGGTGGACCGGTAAGAATGTTGTCT	TAATACGACTCACTATAGGTGCTCACAATCCACATGCTG					0.79348	NS
	Vinc	Vinc-185F39_RNAi	Vinc-816R40_RNAi	631	TAATACGACTCACTATAGGATCAACAGCTCCGACGACAA	TAATACGACTCACTATAGGGCATTGGAGAGCTTTTTCAGC					0.813529	NS
	Eb1	Eb1-29F39_RNAi	Eb1-620R41_RNAi	591	TAATACGACTCACTATAGGCGCTTCCAAGACAATTTCGA	TAATACGACTCACTATAGGATACTCCTCGTCCTCTGGTGGT					0.836435	NS
	CG5938	CG5938-25F41_RNAi	CG5938-376R40_RNAi	351	TAATACGACTCACTATAGGATCTACGAGGATGAGCAGCTGG	TAATACGACTCACTATAGGTCTCCCATTCGAACAGCTTGT					0.840272	NS
	CG7331	CG7331-152F40_RNAi	CG7331-857R40_RNAi	705	TAATACGACTCACTATAGGACATAGCCGTGCAGGATCATC	TAATACGACTCACTATAGGATATCTGTGAAGGCTCCCGGT					0.845615	NS
	CG1643	CG1643-92F40_RNAi	CG1643-752R39_RNAi	660	TAATACGACTCACTATAGGAGCCGGAGCCTTTCTATCTGA	TAATACGACTCACTATAGGTCGGACATCCATTGCAGTTG					0.847109	NS
	put	put-103F40_RNAi	put-808R39_RNAi	705	TAATACGACTCACTATAGGCATAGAATGCGAGCACTTCGA	TAATACGACTCACTATAGGCTTCTCAACGCCCAGGAATT					0.84744	NS
	CG2811	CG2811-27F41_RNAi	CG2811-657R39_RNAi	630	TAATACGACTCACTATAGGTGATAGCACGATACCGCTTGAA	TAATACGACTCACTATAGGCCATGCGTTGAAATCCGTTT					0.849512	NS
	Cyp1	Cyp1-174F39_RNAi	Cyp1-429R40_RNAi	255	TAATACGACTCACTATAGGTCATCCCCAACTTCATGTGC	TAATACGACTCACTATAGGTTCTTGACCACATCCAGTCCC					0.851839	NS
	CG33144	CG33144-253F40_RNAi	CG33144-964R39_RNAi	711	TAATACGACTCACTATAGGTCCAAGAGAAGTTCCCTCAGC	TAATACGACTCACTATAGGCTGCTTTGTGTTGGCCAGAT					0.854428	NS
	CG12789	CG12789-83F40_RNAi	CG12789-788R39_RNAi	705	TAATACGACTCACTATAGGAGAGTCCGCCAATTGATCTCA	TAATACGACTCACTATAGGAGCGGAATAGTTCGGCACAT					0.856041	NS
	alpha-Est3	alpha-Est3-66F40_RNAi	alpha-Est3-776R39_RNAi	710	TAATACGACTCACTATAGGTCTACGGCGATGAGTACGTCA	TAATACGACTCACTATAGGTTGCAGGAAGTCCAAGACCA					0.867815	NS
	CG7327	CG7327-21F39_RNAi	CG7327-355R39_RNAi	334	TAATACGACTCACTATAGGTTCAAGCGTTACGCCATGTT	TAATACGACTCACTATAGGTTTTCACCAAAGACGCATGC					0.868185	NS
	CG8502	CG8502-48F41_RNAi	CG8502-724R41_RNAi	676	TAATACGACTCACTATAGGCCGATTCCCTACAGACATGTGA	TAATACGACTCACTATAGGATATGGATCTGCTCGGTCAGCT					0.871759	NS
	CG7220	CG7220-1F20_RNAi	CG7220-367R21_RNAi	366	TAATACGACTCACTATAGGATGTCCCTGATCAAGGAGCC	TAATACGACTCACTATAGGACGTATATCGTGTTGTCCGGC					0.883226	NS
	Lsp1gamma	Lsp1gamma-37F40_RNAi	Lsp1gamma-737R41_RNAi	700	TAATACGACTCACTATAGGTGTGTGACTGCCTTTAGCGTG	TAATACGACTCACTATAGGGAGAGAGGTTTTCGCGTAGGAA					0.886291	NS
	CG14062	CG14062-274F40_RNAi	CG14062-831R40_RNAi	557	TAATACGACTCACTATAGGTGCTTCGATACCAGAGCTGTG	TAATACGACTCACTATAGGCGTGCGTAGATGTTGTTCAGG					0.891501	NS
	Src42A	Src42A-269F41_RNAi	Src42A-970R41_RNAi	701	TAATACGACTCACTATAGGTGGAGATACTGAATGACACGCA	TAATACGACTCACTATAGGTAGGCTCCTCAACAGTGCAGAC					0.901016	NS
	CG32672 (Atg8a)	CG32672-8F40_RNAi	CG32672-359R41_RNAi	351	TAATACGACTCACTATAGGTCCAATACAAGGAGGAGCACG	TAATACGACTCACTATAGGCATGCCGTAAACATTCTCATCG					0.907551	NS
	CG11899	CG11899-284F40_RNAi	CG11899-987R39_RNAi	703	TAATACGACTCACTATAGGTATGTAATCACCGGCTCCTGG	TAATACGACTCACTATAGGTCAACTGAATCATGCCCTCG					0.909277	NS
	Nrg	Nrg-18F41_RNAi	Nrg-721R41_RNAi	703	TAATACGACTCACTATAGGGATACTGGCCGCGTTACTAGTG	TAATACGACTCACTATAGGCTAACGCCCATCTGTTTGACAT					0.912541	NS
	CG10413	CG10413-143F40_RNAi	CG10413-845R39_RNAi	702	TAATACGACTCACTATAGGACGGATATGTGGAGTTCGGAA	TAATACGACTCACTATAGGAGATTATCCCGCAGCGTTGT					0.922706	NS
	CG1399	CG1399-281F41_RNAi	CG1399-981R39_RNAi	700	TAATACGACTCACTATAGGCCGATCTAACTCCCAGTTGTCC	TAATACGACTCACTATAGGGGCATGGCTTTTGATCGAAT					0.9329	NS
	kin17	kin17-164F39_RNAi	kin17-877R39_RNAi	713	TAATACGACTCACTATAGGTCCTCTTTGCGGACAATCCT	TAATACGACTCACTATAGGACTTTTCGCCCATGGATTTG					0.93374	NS
	CG31704	CG31704-5F40_RNAi	CG31704-205R41_RNAi	200	TAATACGACTCACTATAGGGTTGCCTAGCCTTCATCGCTT	TAATACGACTCACTATAGGAGCATCTTCCCTTCTTCTCCAC					0.939452	NS
	CG2924	CG2924-15F39_RNAi	CG2924-734R40_RNAi	719	TAATACGACTCACTATAGGCACCCTGAAGCAGGAAATCA	TAATACGACTCACTATAGGAGGCGTCTGAGCGATAAATGT					0.940103	NS
	CG10992	CG10992-65F40_RNAi	CG10992-768R41_RNAi	703	TAATACGACTCACTATAGGCACTGCTCTCGGATGAGTTCA	TAATACGACTCACTATAGGATTGGTCATGATCTCCTCCTGA					0.943781	NS
	CG17124	CG17124-11F41_RNAi	CG17124-361R40_RNAi	350	TAATACGACTCACTATAGGGTCTGGAGCAGATGAACGACTG	TAATACGACTCACTATAGGAGCAGATCGCCAATGAACTTC					0.959084	NS
	CaMKI	CaMKI-122F40_RNAi	CaMKI-823R41_RNAi	701	TAATACGACTCACTATAGGGAACAAGGTGTCGTCCATCGT	TAATACGACTCACTATAGGTGACTTTGTACAGATTGCTGCG					0.964647	NS
	rho-5	rho-5-523F39_RNAi	rho-5-1229R39_RNAi	706	TAATACGACTCACTATAGGCAGGTCAAACCCTTTTCGGT	TAATACGACTCACTATAGGTGTGGCTTTCGACCAAATTG					0.965986	NS
	Tsp29Fa	Tsp29Fa-19F40_RNAi	Tsp29Fa-720R40_RNAi	701	TAATACGACTCACTATAGGAGCGCCAATGCTGTGAAGTAT	TAATACGACTCACTATAGGTCTCACGTGCAATGTAGCAGG					0.967934	NS
	GluClalpha	GluClalpha-12F41_RNAi	GluClalpha-418R41_RNAi	406	TAATACGACTCACTATAGGACAGTGTGCAGTTAACCTTCCG	TAATACGACTCACTATAGGTCTCCAGTGTGAAGCGAGGTAG					0.971918	NS
	CG4656	CG4656-45F40_RNAi	CG4656-745R41_RNAi	700	TAATACGACTCACTATAGGCGGAACGTAAACAATCGATCG	TAATACGACTCACTATAGGGCACACATTACCATTGGTCTGC					0.978695	NS
	CG14648	CG14648-34F41_RNAi	CG14648-754R41_RNAi	720	TAATACGACTCACTATAGGTTCCAGAAGTACGATACGCCAG	TAATACGACTCACTATAGGTGGTAATGGTGAGCGAGAGATC					0.997283	NS
	CG32274	CG32274-11F41_RNAi	CG32274-204R39_RNAi	193	TAATACGACTCACTATAGGAGTTCCTAATTGTCCTGTCCGC	TAATACGACTCACTATAGGTCCTTCGCACCAGCATTTTA					1	NS
	CG11786	CG11786-4F40_RNAi	CG11786-581R41_RNAi	577	TAATACGACTCACTATAGGCGTACCGAATACCTGGTCGTT	TAATACGACTCACTATAGGCTACAAGTTTGCTTTCCATGCC					1	NS
	CecC	CecC-14F39_RNAi	CecC-155R40_RNAi	141	TAATACGACTCACTATAGGAGATCTTCGTTTTCGTCGCC	TAATACGACTCACTATAGGCAATTCCCAGTCCTTGAATGG					1	NS
